## Title Page

### **Ketamine effects on anxiety and fear-related behaviors: current literature evidence and new findings**

Gabriela P. Silote<sup>1,4</sup>, Sabrina F.S. de Oliveira<sup>2</sup>, Deidiane E. Ribeiro<sup>4</sup>, Mayara S. Machado<sup>2</sup>, Roberto Andreatini<sup>5</sup>, Sâmia R. L. Joca<sup>3,6</sup>, Vanessa Beijamini<sup>1,2,3</sup>.

<sup>1</sup> Biochemistry and Pharmacology Graduate Program, Federal University of Espírito Santo, Vitória, ES, Brazil.

<sup>2</sup> Department of Pharmaceutical Sciences, Health Science Center, Federal University of Espírito Santo, Vitória, ES, Brazil.

<sup>3</sup> Pharmaceutical Sciences Graduate Program, Health Sciences Center, Federal University of Espírito Santo, Vitória, ES, Brazil.

<sup>4</sup> Department of Physics and Chemistry, School of Pharmaceutical Sciences, University of São Paulo, Ribeirão Preto, SP, Brazil.

<sup>5</sup> Department of Pharmacology, Federal University of Paraná, Curitiba, PR, Brazil.

<sup>6</sup> Aarhus Institute of Advanced Studies (AIAS), Aarhus University, Denmark

Corresponding Author: Vanessa Beijamini

Departamento de Ciências Farmacêuticas

Centro de Ciências da Saúde, UFES

Av. Marechal Campos, 1468, Maruípe

Vitória, ES, 29043-900, Brazil

Phone: +55 (27) 3335 7556

Email: [vanessabh77@gmail.com](mailto:vanessabh77@gmail.com)

[vanessa.harres@ufes.br](mailto:vanessa.harres@ufes.br)

## Highlights

- Ketamine induces mixed effects in animal anxiety tests
- Few studies investigated the individual effects of S-ketamine in anxiety/fear tests
- None study evaluated the effects of R-Ketamine on anxiety/fear-related behaviors
- Systemic ketamine does not affect panic-like behaviors in the elevated T-maze

## Abstract

Ketamine, a non-competitive N-methyl-D-aspartate (NMDA) receptor antagonist, presents rapid and sustained antidepressant effect in clinical and preclinical studies. Regarding ketamine effects on anxiety, there is a widespread discordance among pre-clinical studies. To address this issue, the present study reviewed the literature (electronic database MEDLINE) to summarize the profile of ketamine effects in animal tests of anxiety/fear. We found that ketamine anxiety/fear-related effects may depend on the anxiety paradigm, schedule of ketamine administration and tested species. Moreover, there was no report of ketamine effects in animal tests of fear related to panic disorder (PD). Based on that finding, we evaluated if treatment with ketamine and another NMDA antagonist, MK-801, would induce acute and sustained (24 hours later) anxiolytic and/or panicolytic-like effects in animals exposed to the elevated T-maze (ETM). The ETM evaluates, in the same animal, conflict-evoked and fear behaviors, which are related, respectively, to generalized anxiety disorder and PD. Male Wistar rats were systemically treated with racemic ketamine (10, 30 and 80 mg/kg) or MK-801 (0.05 and 0.1 mg/kg) and tested in the ETM in the same day or 24 hours after their administration. Ketamine did not affect the behavioral tasks performed in the ETM acutely or 24 h later. MK-801 impaired inhibitory avoidance in the ETM only at 45 min post-injection, suggesting a rapid but not sustained anxiolytic-like effect. Altogether our results suggest that ketamine might have mixed effects in anxiety tests while it does not affect panic-related behaviors.

**Key-words:** Ketamine; MK-801; anxiety; fear; panic; elevated T-maze; animal models

## 1. Introduction

Anxiety disorders are the most common mental disorders affecting the world population (Bandelow and Michaelis, 2015; Craske et al., 2017; Stein et al., 2017). Anxiety is also a frequent symptom in many mental disorders (Millan et al., 2015). Antidepressants and benzodiazepines, drugs that affect the serotonergic and GABAergic neurotransmission, respectively, are commonly used to treat anxiety disorders such as generalized anxiety disorder (GAD) and panic disorder (PD) (Bandelow et al., 2017; Craske et al., 2017; Koen and Stein, 2011; Nash and Nutt, 2005). However, these drugs present several limitations that limit their use (Bandelow et al., 2017; Blier and Abbott, 2001; Nash and Nutt, 2005) and drive the search for other molecular targets and new drugs.

A plenty body of evidence from clinical and preclinical studies suggests the involvement of glutamatergic neurotransmission in anxiety disorders (Averill et al., 2017; Griebel and Holmes, 2013; Harvey and Shahid, 2012; Rianza Bermudo-Soriano et al., 2012). For instance, adolescent patients diagnosed with GAD showed positive correlation between glutamatergic tone and severity of anxiety symptoms (Strawn et al., 2013) whereas patients with social anxiety showed an increase in glutamate/creatine ratio in the anterior cingulate cortex (Phan et al., 2005). In particular, the therapeutic potential of a variety of negative modulators of glutamate transmission has been described over the last years (Ferraguti, 2018; Griebel and Holmes, 2013; Murrough et al., 2015).

Ketamine, a dissociative anesthetic acting as a non-competitive NMDA antagonist receptor, presents promising rapid and transient antidepressant effect in clinical and pre-clinical studies, which can last for up to 14 days (Berman et al., 2000; Diazgranados et al., 2010; Li et al., 2011; Maeng et al., 2008; McCloud et al., 2015; Murrough et al., 2013; Newport et al., 2015). Besides that, patients with major depressive disorder have shown significant reduction of anxiety symptoms after ketamine infusion (Salvadore et al., 2009; Zarate Jr et al., 2006). In contrast, few studies reported the effect of ketamine in patients suffering from anxiety disorders (Banov et al., 2019; Glue et al., 2018, 2017; Irwin et al., 2013; Mohammad Shadli et al., 2018; Taylor et al., 2018). For example, ketamine induced rapid and sustained anxiolytic effect in patients suffering from refractory GAD and/or social anxiety disorder, who were not depressed (Glue et al., 2017). In a case report, ketamine produced a sustained resolution of PD, agoraphobia, and GAD after a single infusion in a patient (Ray and Kious, 2016).

There is a widespread discordance among pre-clinical studies addressing the effects of ketamine on anxiety/fear-related behaviors. Additionally, narrative or systematic reviews on ketamine effects in animal tests of anxiety/fear are lacking. In this context, the current study comprehensively reviewed the literature to summarize the effect profile of ketamine on tests of anxiety/fear-related behaviors to improve our understanding about this topic. We found that ketamine effects on anxiety/fear-related behaviors may depend on several factors, as the type of anxiety evoked by the paradigm, schedule of ketamine administration and tested species/sex. Besides that, we also found that the majority of studies evaluated ketamine effects in animal models related to GAD whereas none study evaluated ketamine effects in animal models related to PD.

Based on the aforementioned considerations, another aim of our study was to investigate if ketamine would induce a rapid and sustained anxiolytic and/or panicolytic-like effect in rats exposed to the elevated T-Maze (ETM). The ETM evaluates, in the same animal, conflict-evoked and innate anxiety behaviors which are related, respectively, to GAD and PD (Moreira et al., 2013; Zangrossi Jr and Graeff, 2014). To this end, we compared the effects of a single injection of ketamine or MK-801 (an NMDA antagonist, also call dizocilpine; Huettner and Bean, 1988; Wong et al., 1986) in the inhibitory avoidance and escape responses generated by the ETM acutely and 24 hours after their administration.

## **2. Material and methods**

### **2.1 Literature review**

We performed a comprehensive literature review to summarize ketamine effects in studies that evaluate anxiety/fear-related defensive behaviors. We performed a preliminary search in the electronic database MEDLINE and found out that some studies that investigated the antidepressant-like effect of ketamine also evaluated its anxiety-related effects as a secondary outcome. Thus, we decide to include, in our search, terms related to depression. Although the post-traumatic stress disorder (PTSD) had been removed from the anxiety disorder category of the Diagnostic and Statistical Manual of Mental Disorders, Fifth Edition (DSM-5), patients' suffering from PTSD

frequently exhibit signs of anxiety. Consequently, we also included search terms related to PTSD.

Thus, the studies were searched in the electronic database MEDLINE via the search engine PubMed® using the following Medical Subject Headings (MeSH®) terms as descriptors: (((("Ketamine"[Mesh]) AND (((((((((((("Depression"[Mesh]) OR "Depressive Disorder"[Mesh:NoExp]) OR "Depressive Disorder, Major"[Mesh]) OR "Depressive Disorder, Treatment-Resistant"[Mesh]) OR "Fear"[Mesh:NoExp]) OR "Panic"[Mesh]) OR "Anxiety"[Mesh:NoExp]) OR "Performance Anxiety"[Mesh]) OR "Stress Disorders, Traumatic"[Mesh:NoExp]) OR "Stress Disorders, Post-Traumatic"[Mesh]) OR "Stress Disorders, Traumatic, Acute"[Mesh]) OR "Anti-Anxiety Agents"[Mesh]) OR "Anti-Anxiety Agents" [Pharmacological Action])) AND (((((((("Animal Experimentation"[Mesh]) OR "Models, Animal"[Mesh:NoExp]) OR "Disease Models, Animal"[Mesh:NoExp]) OR "Animals"[Mesh]) OR "Behavior, Animal"[Mesh]) OR "Animals, Laboratory"[Mesh])). "Other Animals" filter was applied in the research to exclude studies with humans.

Two independent researchers reviewed the articles at one or more of four levels of detail (title, abstract, full text and a detailed review of experimental design) to determine their eligibility. The inclusion criteria adopted were: (1) administration of ketamine (any dose, route and schedule of treatment) as an intervention group and an appropriated control group; (2) primary behavior data from a test related to anxiety; (3) detailed outcome data (mean, standard error or standard deviation, and sample sizes of both control and intervention groups). Studies that administered ketamine at drinking water or that administered a combination of drugs (including ketamine) to the subjects were excluded.

Regarding item 2 (primary behavior data from a test related to anxiety), we considered all behavioral tests that measure any kind of trace or state anxiety or fear elicited by aversive stimuli (Bourin, 2015; Cryan and Sweeney, 2011; Lezak et al., 2017). For example, although there is no consensus that the open field test is an animal model of anxiety, many researchers consider that proportion of time or entries in the center of the open field would reflect trace anxiety (Harro, 2018; Prut et al., 2003). Thus, of the studies that evaluated ketamine effects on the open field, we selected only those studies that reported exploration of the center of the open field.

The selected articles were transferred electronically to Mendeley software (version 1.17.13). We collected the following data from each of the included studies: authors, year of publication, animal details (specie, gender and strain), treatment regimen of ketamine, type of ketamine (racemic mixture, S-ketamine or R-ketamine), test of anxiety/fear and behavioral outcome. In the studies that did not describe the type of ketamine, but did mention the manufacturer of ketamine, we searched the grey literature (google search) to identify the type of ketamine based on manufacturer information. We performed the review of the literature to include articles published between January, 1972 and June, 2018.

## **2.2 Behavioral Analysis**

### **2.2.1 Animals**

A total of 164 naïve male adult Wistar rats were obtained from the breeding colony of Federal University of Espirito Santo and were allowed to acclimatize in our laboratory for 3 weeks before starting the tests. They were housed in groups of 4 in Plexiglas cointainers (49 x 34 x 26 cm), under 12 h/12 h at light/dark cycle (lights on at 6:30 am) and in a temperature-controlled room (22-24 °C), with free access to tap water and standard chow diet (Nuvilab CR1, Quimtia S.A., Brazil). Cages were lined with wood shavings and replaced by clean cages 3 times/week. No enrichment material was used inside the cages. At the moment of the tests, rats were weighing 280 to 350 g and aging 12 to 14 weeks. The animals were randomly assigned in independent groups to the different treatment conditions and each rat was tested only once. All behavioral experiments were conducted between 12:00 and 6:00 pm. The experimental procedures were conducted in accordance with the National Council for Control of Animal Experimentation (CONCEA, Brazil) and with EU Directive 2010/63/EU for animal experiments. Protocols were approved by the local Committee for the Ethical Use of Animals in scientific research (CEUA, 048/2014).

### **2.2.2 Drugs**

The following drugs were used: ketamine hydrochloride, racemic mixture (Syntec do Brasil, Cotia, SP, Brazil), a non-competitive NMDA antagonist receptor, was administered by intraperitoneal (i.p.) route at sub-anesthetic (10 and 30 mg/kg) and

anesthetic doses (80 mg/kg; doses based on Harkin et al., 2003 and pilot studies in our laboratory); MK-801, also known as dizocilpine (Sigma-Aldrich, St. Louis, MO, USA), a non-competitive NMDA antagonist receptor, was administered by i.p. injection at doses of 0.05 and 0.1 mg/kg (Maeng et al., 2008). All the drugs were freshly dissolved in NaCl 0.9 % (saline). We confirmed that ketamine 80 mg/kg induced anesthesia by checking the lost of tail pinch reflex and pedal withdrawal reflex in the treated animals. Animals that received the sub-anesthetic doses of ketamine did not exhibit sedation or severe ataxia after administration. The animals from control groups received saline 1 ml/kg by i.p. route.

### **2.2.3 Behavioral Tests**

#### **2.2.3.1 Elevated T-maze (ETM)**

The ETM was derived from the elevated plus maze and was developed by Graeff and colleagues (Zangrossi and Graeff, 1997) to evaluate, in the same apparatus, conflict-evoked and fear behaviors. Accordingly, the differences in the experimental setups between the EPM and ETM were mostly procedural. The apparatus consists of 3 arms of equal dimension (50 cm × 10 cm) that were elevated from the floor 50-cm. One of these arms is surrounded by 40-cm high walls and perpendicular to 2 open arms. Three days before the test, rats were handled once a day during 5 minutes to reduce the aversion to the experimenter. Twenty-four hours before the test, the animals were subjected to 30-min confinement in an open arm. This procedure facilitates escape by reducing exploration of the open arms (Teixeira et al., 2000). On the next day, the acquisition of inhibitory avoidance was assessed by placing the rat at the end of the closed arm and measuring the time that the rat took to leave the closed arm in 3 consecutive trials (baseline, inhibitory avoidance 1 and 2). Escape response was assessed by placing the animal on the extremity of the previously explored open arm and measuring the latency that the animal took to leave this arm in three successive trials (escape 1, escape 2 and escape 3). A cut off time for inhibitory avoidance and escape was 300 s. The experimenter was blind to the pharmacological treatment.

#### **2.2.3.2 Open field test (OFT)**

The arena (open field) consists of a wooden box with 1 m<sup>2</sup> area and 30-cm high walls. Immediately after the ETM test, the rats were placed in the center of the arena to measure locomotor activity for 5 min. The arena was cleaned with a water-alcohol solution (10%) after each animal was tested. The tests were videorecorded with a webcam that was connected to a computer. Total distance traveled (m) was analyzed by the Anymaze 4.98 path-tracking software (Stoelting, Wood Dale, IL, USA).

## **2.3 Experimental Design**

### **2.3.1 Experiment 1 – Evaluation of acute effect of systemic administration of ketamine and MK-801 in the ETM and OFT**

This experiment was designed to evaluate acute effects of both ketamine and MK-801 in the ETM. Firstly, the animals were submitted to a pre-exposure to one of the open arms of the maze. On the test day, the animals received the injection of ketamine at doses of 10 and 30 mg/kg (sub-anesthetic doses) or saline i.p. The test was performed 45 min after injection. An independent group of animals received one injection of ketamine 80 mg/kg (anesthetic dose) or saline 2 hours before the test, to ensure that the animals would not be sedated at the moment of the tests (based in a pilot study). The last independent group of animals was treated with MK-801 at doses of 0.05 and 0.1 mg/kg or saline 45 min before the test. All animals were tested in the ETM and immediately after submitted to the OFT to evaluate their spontaneous locomotor activity.

### **2.3.2 Experiment 2 - Evaluation of sustained effect of systemic administration of ketamine and MK-801 in the ETM and OFT**

In this experiment, the animals were treated with ketamine (10, 30 and 80 mg/kg), MK-801 (0.05 and 0.1 mg/kg) or saline i.p. 24 hours before the test to evaluate possible sustained effects in the ETM and in the OFT.

## **2.4 Statistical analysis**

Data analyses were performed using Statistical Package for the Social Sciences SPSS 20.0 software (IBM SPSS Statistics<sup>®</sup>, Chicago, IL, USA). The homogeneity of variances was assessed using Levene test. When Levene's test showed that data were



not homocedastic, data were log-transformed previously to analyses. Data from ETM (inhibitory avoidance and escape) were analyzed using a two-way repeated measure analysis of variance (ANOVA), with treatment as the independent factor and trials (baseline, avoidance 1–2, and escape 1–3) as the dependent factors. Significant effects of the independent factor or the interaction between the independent and dependent factors were followed by Dunnett *post hoc* test. Data from the OFT were analyzed by one-way ANOVA followed by Dunnett *post hoc* test when appropriate. Data from the OFT of experiment that evaluated the anesthetic dose of ketamine were analyzed using unpaired Student's t-test. The significance level was set at  $p < 0.05$ . Data were expressed as mean  $\pm$  SEM.

### 3 Results

#### 3.1 Literature Review

After applying the MeSH<sup>®</sup> words previously described, we found 2038 studies in our literature search. Thus, we applied the filter “Other Animals” to refine our search and found 795 studies. After a check against inclusion and exclusion criteria, we initially selected 51 studies that evaluated ketamine effects in animal tests of anxiety/fear. We excluded 3 studies that evaluated ketamine effects in animals chronically exposed to ethanol. We also excluded 1 study that administered ketamine in drinking water and 2 studies that did not exhibit outcome data (mean and S.E.M.).

Table 1 summarizes data extracted from the 45 selected studies. The reporting of details was variable across studies. Fifty five percent of all selected studies were performed in rats, 37 % were performed in mice and only 13 % included females in their evaluation. The vast majority of studies tested ketamine in adult animals. However, in 8 studies, the age of animals was not reported. These studies described the weight of the animals, from which age cannot be properly identified.

The majority of studies did not report directly which type of ketamine (racemic mixture or isomer) was used. Thus, we searched the grey literature (google search) to identify the type of ketamine based on manufacturer information. In 9 studies we were still unable to identify the type of ketamine. Of the total of selected studies, only 4 evaluated the effects of S-ketamine. No studies evaluated the effects of R-ketamine on

anxiety/fear-related behaviors. Only 4 experiments evaluated the effects of anesthetic doses of ketamine.

Most of the selected studies assessed anxiety/fear-related behaviors using the EPM, NSF and fear conditioning. No selected studies evaluated the effect of ketamine in animal tests related to PD. Regarding the outcome of studies performed in rats, 14 experiments detected an anxiolytic-like effect of ketamine, 9 experiments detected an anxiogenic-like effect and 19 described null effect of ketamine. From the experiments in which ketamine had null effect (total number 19), 8 tested doses of ketamine under 10 mg/kg (potentially sub-effective doses) and 6 evaluated anxiety-related behaviors at least 24 h after ketamine administration.

In experiments performed in mice, the pattern of results was similar. Twelve experiments detected an anxiolytic-like effect of ketamine, 2 experiments detected an anxiogenic-like effect and 10 described null effect of ketamine. From the experiments describing that ketamine had null effect (total number 10), 6 tested doses of ketamine under 10 mg/kg (potentially sub-effective doses) and 3 evaluated anxiety-related behaviors at least 24 h after ketamine administration.

**Table 1.** Effects of ketamine on anxiety/fear-related behaviors.

| Study               | Sex, Specie and strain | Treatment Regimen | Test                    | Behavioral outcome | Comments   |                        |
|---------------------|------------------------|-------------------|-------------------------|--------------------|------------|------------------------|
| <b>Rats</b>         |                        |                   |                         |                    |            |                        |
| <b>R/S Ketamine</b> |                        |                   |                         |                    |            |                        |
|                     |                        |                   | Social interaction test | Anxiogenic         |            |                        |
| <b>1</b>            | Silvestre et al., 1997 | Male Wistar rats  | 7 mg/kg i.p.            | EPM                | Anxiogenic | Socially isolated rats |
|                     |                        |                   | Holeboard test          | No effect          |            |                        |
| <b>2</b>            | Babar et al., 2001     | Male Wistar rats  | 3 mg/kg i.p.            | One way escape     | No effect  | In sham lesion animals |
|                     |                        |                   | Freezing response       | No effect          |            |                        |
|                     |                        |                   | 10 mg/kg i.p.           | One-way escape     | Anxiogenic |                        |

|          |                          |                                     |                                          | Freezing response   | Anxiolytic             |                                                                                                                      |
|----------|--------------------------|-------------------------------------|------------------------------------------|---------------------|------------------------|----------------------------------------------------------------------------------------------------------------------|
| <b>3</b> | Pietersen et al., 2006   | Male Sprague-Dawley rats            | 16 mg/Kg<br>s.c.once a day<br>for 2 days | Fear Conditioning   | Anxiogenic/ anxiolytic | Anxiogenic in naive animals/Anxiolytic in conditioned animals                                                        |
| <b>4</b> | Loss et al., 2012        | Male Wistar rats                    | 22.5 mg/Kg<br>i.p.                       | EPM                 | Anxiogenic/anxiolytic  | Ketamine injection at PND15; EPM test at PND80; anxiogenic in naive animals/anxiolytic in status epilepticus animals |
| <b>5</b> | Burgdorf et al., 2013    | Male Sprague-Dawley rats            | 10 mg/kg i.v.                            | NSF                 | Anxiolytic             |                                                                                                                      |
| <b>6</b> | Carrier and Kabbaj, 2013 | Male and female Sprague-Dawley rats | 2.5, 5 and 10 mg/Kg                      | EPM                 | No effect              | Test 24 h post injection                                                                                             |
|          |                          |                                     |                                          | Light-dark box test | No effect/ Anxiogenic  | Anxiogenic in females                                                                                                |
|          |                          |                                     |                                          | NSF                 | Anxiolytic             |                                                                                                                      |
| <b>7</b> | Kilic et al., 2014       | Female Sprague-Dawley rats          | 10 mg/kg i.p.                            | EPM                 | Anxiolytic             |                                                                                                                      |

|    |                            |                          |                                        |                              |            |                                                                  |
|----|----------------------------|--------------------------|----------------------------------------|------------------------------|------------|------------------------------------------------------------------|
| 8  | Juven-Wetzler et al., 2014 | Male Sprague-Dawley rats | 0.5, 5 and 15 mg/Kg (for 3 d)          | EPM                          | No effect  | Test 30 d post injection                                         |
| 9  | Walker et al., 2015        | Male albino Wistar rats  | 10 mg/kg i.p.                          | OFT                          | No effect  |                                                                  |
| 10 | Melo et al., 2015          | Male Wistar rats         | 10 mg/kg i.p. (once a day for 3 d)     | EPM                          | No effect  | Previously stressed rats; Test 11 d post ketamine last injection |
|    |                            |                          | 0.625 mg/kg i.p. (once a day for 18 d) |                              | Anxiolytic |                                                                  |
| 11 | Zhang et al., 2015         | Male Sprague-Dawley rats | 1.25 mg/kg i.p. (once a day for 18 d)  | EPM                          | No effect  | Previously stressed rats                                         |
|    |                            |                          | 2.5 mg/kg i.p. (once a day for 18 d)   |                              | Anxiolytic |                                                                  |
| 12 | Duclot et al., 2016        | Male Sprague-Dawley rats | 10 mg/Kg i.p.                          | Contextual Fear Conditioning | Anxiolytic | In a reconsolidation task                                        |
|    |                            |                          | 20 mg/kg i.p.                          |                              | No effect  |                                                                  |
| 13 | Holubova et al., 2016      | Male Wistar rats         | 10 mg/Kg i.p.                          | EPM                          | No effect  | Test 24 h post injection; sham anim/als                          |

|                             |                           |                          |                                                 |                                                |                                      |                                                              |
|-----------------------------|---------------------------|--------------------------|-------------------------------------------------|------------------------------------------------|--------------------------------------|--------------------------------------------------------------|
| 14                          | Girgenti et al., 2017     | Male Sprague-Dawley rats | 10 mg/kg i.p.                                   | Contextual and Cue Fear Conditioning           | Anxiolytic                           | Test 24 h post injection; extinction task                    |
| 15                          | Magalhaes et al., 2017    | Male Wistar rats         | 100 mg/Kg                                       | EPM                                            | No effect                            | Test 48 h post injection                                     |
| 16                          | Papp et al., 2017         | Male Wistar rats         | 10 mg/Kg (once a day for 4 d or 5 w)            | EPM                                            | Anxiolytic                           | Test post chronic mild stress; Test 24 h post last injection |
| <b>S-Ketamine</b>           |                           |                          |                                                 |                                                |                                      |                                                              |
| 17                          | Soumier et al., 2016      | Male Long-Evans rats     | 2.5 and 5 mg/kg<br>10 mg/kg                     | NSF                                            | No effect<br>Anxiolytic              |                                                              |
| 18                          | Trevlopoulou et al., 2016 | Male Wistar rats         | 8 mg/Kg i.p (once a day for 3 d)                | Social interaction test<br>Light-dark box test | Anxiogenic<br>No effect              |                                                              |
| 19                          | Saur et al., 2017         | Male Wistar rats         | 10 mg/kg                                        | Fear Conditioning                              | Anxiogenic                           | Test 24 h post injection                                     |
| <b>Non-specified isomer</b> |                           |                          |                                                 |                                                |                                      |                                                              |
| 20                          | Engin et al., 2009        | Male Sprague-Dawley rats | 10 mg/kg i.p.<br>50 mg/kg i.p.<br>50 mg/kg i.p. | EPM<br>EPM<br>OFT                              | No effect<br>Anxiolytic<br>No effect |                                                              |

|                     |                     |                          |                                               |                         |                         |                                                                            |
|---------------------|---------------------|--------------------------|-----------------------------------------------|-------------------------|-------------------------|----------------------------------------------------------------------------|
| 21                  | Li et al., 2010     | Male Sprague-Dawley rats | 10 mg/kg i.p.                                 | NSF                     | Anxiolytic              |                                                                            |
| 22                  | Wang et al., 2014   | Male Wistar rats         | 10 mg/kg i.p.                                 | NSF                     | Anxiolytic              |                                                                            |
| 23                  | Liu et al., 2016    | Male Sprague-Dawley rats | 10 mg/Kg                                      | OFT                     | Anxiolytic              | Test post chronic unpredictable stress;<br>Test 24 h post injection        |
| 24                  | Morena et al., 2017 | Male Sprague-Dawley rats | 100 and 125 mg/Kg i.p.                        | Inhibitory avoidance    | Anxiogenic              | Tests 48 h post injection<br>Social interaction test post footshock stress |
|                     |                     |                          | 125 mg/Kg i.p.                                | Fear Conditioning       | No effect               |                                                                            |
|                     |                     |                          | 125 mg/Kg i.p.                                | Social interaction test | Anxiogenic              |                                                                            |
| 25                  | Jiang et al., 2017  | Male Sprague-Dawley rats | 10 mg/kg<br>10 mg/kg (once a day for 15 days) | EPM                     | Anxiolytic<br>No effect | Test post chronic mild stress<br>Test 24 h post last injection             |
| <b>Mice</b>         |                     |                          |                                               |                         |                         |                                                                            |
| <b>R/S Ketamine</b> |                     |                          |                                               |                         |                         |                                                                            |
| 1                   | Hayase et al., 2006 | Male ICR mice            | 30 mg/kg i.p.<br>100mg/kg i.p.                | EPM                     | Anxiolytic              |                                                                            |

|          |                            |                      |               |                                       |            |                                                     |
|----------|----------------------------|----------------------|---------------|---------------------------------------|------------|-----------------------------------------------------|
|          |                            |                      |               | EPM                                   | No effect  | Test 24 h post injection                            |
| <b>2</b> | Autry et al., 2011         | Male C57BL/6 mice    | 3 mg/kg i.p.  | Contextual and cued fear conditioning | No effect  | Acquisition task                                    |
|          |                            |                      |               | NSF                                   | Anxiolytic | Previously stressed mice                            |
| <b>3</b> | Fukumoto et al., 2014      | Male C57BL/6J mice   | 30 mg/kg i.p. | NSF                                   | Anxiolytic |                                                     |
|          |                            |                      |               | OFT                                   | No effect  | Previously stressed and no stressed mice            |
|          |                            | Male C57BL/6J mice   |               | MBT                                   | No effect  | Previously stressed mice<br>Test 4 d post injection |
| <b>4</b> | Franceschelli et al., 2015 |                      | 10 mg/kg i.p. | OFT                                   | Anxiogenic | Previously stressed and no stressed mice            |
|          |                            | Female C57BL/6J mice |               | MBT                                   | No effect  | Previously stressed mice<br>Test 4 d post injection |



|   |                        |                             |                                        |                                       |            |                                                                                            |
|---|------------------------|-----------------------------|----------------------------------------|---------------------------------------|------------|--------------------------------------------------------------------------------------------|
| 5 | Sobota et al., 2015    | Juvenile Male C57BL/6J mice | 20 mg/kg i.p.                          | Three-chamber social interaction test | Anxiogenic | Single housed mice                                                                         |
|   |                        |                             |                                        | OFT                                   | No effect  |                                                                                            |
| 6 | Zanos et al., 2015     | Male CD-1 mice              | 10 mg/kg i.p.                          | NSF                                   | Anxiolytic |                                                                                            |
|   |                        |                             | 0.625 mg/kg i.p. (once a day for 18 d) |                                       | No effect  |                                                                                            |
| 7 | Zhang et al., 2015     | Male ICR mice               | 1.25 mg/kg i.p. (once a day for 18 d)  | Contextual fear conditioning          | Anxiolytic |                                                                                            |
|   |                        |                             | 2.5 mg/kg i.p. (once a day for 18 d)   |                                       | Anxiolytic |                                                                                            |
| 8 | Brachman et al., 2016a | Male C57BL/6NTac mice       | 10 and 90 mg/Kg i.p.                   | NSF                                   | Anxiolytic | Post repeated corticosterone administration for 2 weeks; Test 28 d post ketamine injection |
|   |                        |                             | 30 mg/kg i.p.                          |                                       | No effect  | Post chronic social                                                                        |
|   |                        | Male 129S6/SvEvTac          | 30 mg/kg i.p.                          | NSF                                   | No effect  |                                                                                            |

|                             |                      |                                            |                                      |                                                   |                                       |                                                                                                                                   |
|-----------------------------|----------------------|--------------------------------------------|--------------------------------------|---------------------------------------------------|---------------------------------------|-----------------------------------------------------------------------------------------------------------------------------------|
|                             |                      | mice                                       |                                      | Contextual Fear Conditioning                      | No effect                             | defeat; Test 7 or 24 d post injection                                                                                             |
|                             |                      |                                            |                                      | EPM                                               | No effect                             |                                                                                                                                   |
| <b>9</b>                    | Lin et al., 2016     | Male ICR mice                              | 10 mg/kg                             | NSF                                               | Anxiolytic                            |                                                                                                                                   |
| <b>10</b>                   | Thelen et al., 2016  | Male C57BL/6J mice<br>Female C57BL/6J mice | 5 and 10 mg/kg (once a day for 15 d) | OFT                                               | No effect<br>Anxiogenic               | Test 24 h post last injection                                                                                                     |
| <b>11</b>                   | Pham et al., 2017    | Male BALB/cJ mice                          | 10 mg/Kg i.p.                        | EPM<br>NSF                                        | No effect<br>Anxiolytic               | Test 24 h post last injection                                                                                                     |
| <b>12</b>                   | McGowan et al., 2017 | 129S6/SvEvTac mice                         | 30 mg/Kg i.p                         | Contextual Fear Conditioning                      | Anxiolytic                            | Test 7 d post injection; ketamine injection 1 week before CFC; no effect when ketamine was administered 1 h or 1 month before CFC |
| <b>13</b>                   | Popik et al., 2017   | Male Swiss (CD-1) mice                     | 5, 10, 15 and 25 mg/kg               | Mouse four-plate test<br>Passive avoidance<br>MBT | No effect<br>Anxiolytic<br>Anxiolytic | Retention task                                                                                                                    |
| <b>14</b>                   | Fraga et al., 2018   | Female Swiss mice                          | 1 and 10 mg/kg                       | EPM<br>Light-dark box test<br>MBT                 | Anxiolytic<br>Anxiolytic<br>No effect |                                                                                                                                   |
| <b>Non-specified isomer</b> |                      |                                            |                                      |                                                   |                                       |                                                                                                                                   |

|                      |                        |                                                  |                                                    |                                                  |            |                                  |
|----------------------|------------------------|--------------------------------------------------|----------------------------------------------------|--------------------------------------------------|------------|----------------------------------|
| 15                   | Amann et al., 2009     | Male C57BL/6J mice                               | 5 mg/kg i.p.<br>(once a day<br>for 14 d + 14<br>d) | Contextual Fear<br>Conditioning                  | Anxiolytic |                                  |
| 16                   | Ito et al., 2015       | Male<br>v129SvEv/C57BL/6N<br>F1 hybrid mice were | 10 mg/kg i.p.                                      | Passive avoidance<br>after observational<br>fear | Anxiolytic |                                  |
| 17                   | Vogt et al., 2015      | Male C57BL/6N<br>mice                            | 30 mg/kg i.p.                                      | OFT                                              | No effect  |                                  |
| <b>Other species</b> |                        |                                                  |                                                    |                                                  |            |                                  |
| <b>R/S Ketamine</b>  |                        |                                                  |                                                    |                                                  |            |                                  |
| 1                    | Riehl et al., 2011     | Male and female<br>Zebrafish                     | 20 and 40<br>mg/L                                  | Novel tank test                                  | Anxiolytic | Exposure during 20 min           |
|                      |                        |                                                  | 20 mg/L                                            | Light-dark box test                              | Anxiolytic |                                  |
| 2                    | De Campos et al., 2015 | Male and female<br>Zebrafish                     | 5 and 20<br>mg/L                                   | Light-dark box test                              | No Effect  | Exposure during 20 min           |
|                      |                        |                                                  | 40 and 60<br>mg/L                                  |                                                  | Anxiolytic |                                  |
| 3                    | Burhans et al., 2017   | Male New Zealand<br>White rabbits                | 5, 10 e 20<br>mg/kg i.m.                           | Conditioning-specific<br>reflex modification     | No effect  | Test 1 and 7 d post<br>injection |

**Abbreviation:** EPM, Elevated Plus-Maze; NSF, Novelty-Suppressed Feeding; OFT, Open Field Test; MBT, Marble Burying Test.

## 3.2 Behavioral Analysis

### 3.2.1 Experiment 1 - Evaluation of acute effect of systemic administration of ketamine and MK-801 in the ETM and OFT

The sub-anesthetic doses of ketamine (10 and 30 mg/kg) did not affect the inhibitory avoidance performance [trial effect:  $F_{(2, 76)} = 33.937$ ;  $p < 0.001$ ; treatment:  $F_{(2, 38)} = 0.289$ ;  $p = 0.751$ ; interaction between treatment and trial:  $F_{(4, 76)} = 1.373$ ;  $p = 0.251$ ; Fig. 1A] and escape performance [Trial effect:  $F_{(1.569, 76)} = 0.852$ ;  $p = 0.370$ ; treatment:  $F_{(2, 38)} = 0.119$ ;  $p = 0.888$ ; interaction between treatment and trial:  $F_{(3.138, 76)} = 1.599$ ;  $p = 0.197$  (Fig. 1B) in the ETM. The sub-anesthetic doses of ketamine also did not impair locomotor activity in the OFT ( $F_{(2, 38)} = 0.23$ ;  $p = 0.795$ ; Table 2).

The anesthetic dose of ketamine (80 mg/kg) changed inhibitory avoidance performance in the ETM [trial effect:  $F_{(2, 54)} = 15.434$ ;  $p < 0.001$ ; treatment:  $F_{(1, 27)} = 0.015$ ;  $p = 0.903$ ; interaction between treatment and trial:  $F_{(2, 54)} = 3.534$ ;  $p = 0.036$ ; Fig. 1C]. Specifically, the anesthetic dose of ketamine increased baseline avoidance ( $t_{(27)} = -2.020$ ;  $p = 0.062$ ) but not avoidance 1 ( $t_{(27)} = 0.482$ ;  $p = 0.633$ ) and avoidance 2 ( $t_{(27)} = 0.974$ ;  $p = 0.339$ ). Ketamine 80 mg/kg did not affect the escape behavior [trial effect:  $F_{(2, 54)} = 0.527$ ;  $p = 0.593$ ; treatment:  $F_{(1, 27)} = 0.702$ ;  $p = 0.410$ ; interaction between treatment and trial:  $F_{(2, 54)} = 1.462$ ;  $p = 0.241$ ; Fig. 1D] in the ETM nor the total distance traveled in the OFT ( $t_{(27)} = -1.482$ ;  $p = 0.150$ ; Table 2).

We also evaluated the effects of another non-competitive NMDA receptor antagonist, MK-801, in the ETM. Systemic administration of MK-801 changed inhibitory avoidance performance in the ETM [trial effect:  $F_{(2, 62)} = 15.491$ ;  $p < 0.001$ ; treatment:  $F_{(2, 31)} = 4.113$ ;  $p = 0.026$ ; interaction between treatment and trial:  $F_{(4, 62)} = 0.778$ ;  $p = 0.543$ ). Dunnett's *post hoc* test showed that the lowest dose of MK-801 (0.05 mg/kg) impaired inhibitory avoidance compared to the control group ( $p < 0.05$ ; Fig. 1E). MK-801 did not impair the escape performance [trial effect:  $F_{(1.242, 38.505)} = 4.046$ ;  $p < 0.05$ ; treatment:  $F_{(2, 31)} = 1.494$ ;  $p = 0.240$ ; interaction between treatment and trial:  $F_{(2.484, 38.505)} = 1.456$ ;  $p = 0.245$ ; Fig. 1F] in the ETM nor the locomotor activity in the OFT ( $F_{(2, 31)} = 1.581$ ;  $p = 0.222$ ; Table 2).

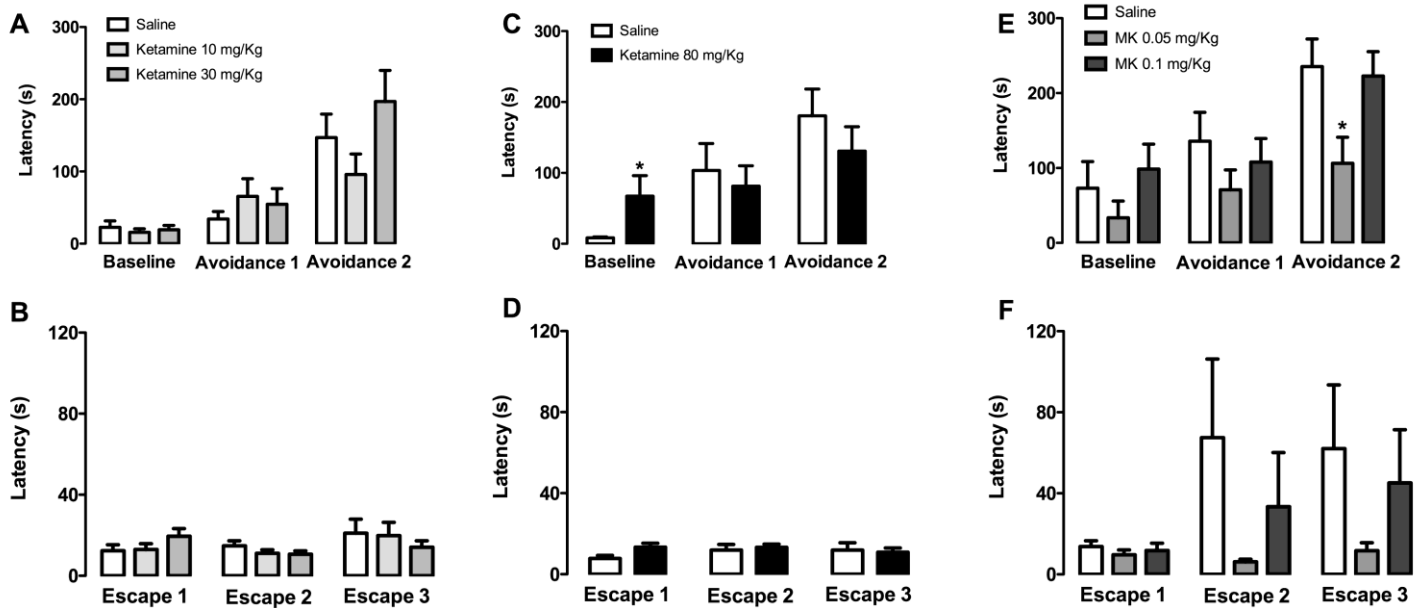

**Figure 1.** Acute effects of systemic administration (i.p.) of ketamine and MK-801 on behavioral tasks in the elevated T-maze. **A** and **B** represent inhibitory avoidance and escape, respectively, from rats treated with ketamine 10 mg/Kg (n=14), 30 mg/Kg (n=12) or saline (control group; n= 15) 45 min before the test; **C** and **D** represent inhibitory avoidance and escape, respectively, from rats treated with ketamine 80 mg/Kg (n=16) or saline (n= 13) 2 h before the test; **E** and **F** represent inhibitory avoidance and escape, respectively, from rats treated with MK-801 0.05 mg/Kg (n= 13), 0.1 mg/Kg (n= 11) or saline (n= 10) 45 min before the test. \*p < 0.05 compared to control group in the same trial (two-way ANOVA followed by Dunnett's *post hoc* test). The data are expressed as mean ± SEM.

### 3.2.2 Experiment 2 - Evaluation of sustained effect of systemic administration of ketamine and MK-801 in the ETM and OFT

Administration of ketamine 24 h before the ETM did not affect the inhibitory avoidance [trial effect:  $F_{(2, 72)} = 28.867$ ;  $p < 0.001$ ; treatment:  $F_{(3, 36)} = 0.501$ ;  $p = 0.684$ ; interaction between treatment and trial:  $F_{(6, 72)} = 2.011$ ;  $p = 0.075$ ; Fig. 2A] and the escape performance [trial effect:  $F_{(2, 72)} = 5.907$ ;  $p < 0.05$ ; treatment:  $F_{(3, 36)} = 0.944$ ;  $p = 0.430$ ; interaction between treatment and trial:  $F_{(6, 72)} = 1.202$ ;  $p = 0.315$ ; Fig. 2B]. Also, ketamine, at all tested doses, did not impair the locomotor activity in the OFT ( $F_{(3, 36)} = 1.243$ ;  $p = 0.309$ ; Table 2).

As a single injection of MK-801 0.05 mg/kg acutely impaired inhibitory avoidance in the ETM, we tested if this dose of MK-801 would induce a sustained anxiolytic-like effect. We showed that prior administration of MK-801 0.05 mg/Kg (24 h before the test) did not affect the inhibitory performance [trial effect:  $F_{(2, 38)} = 17.961$ ;  $p < 0.001$ ; treatment:  $F_{(1,19)} = 0.316$ ;  $p = 0.581$ ; interaction between trial and treatment:  $F_{(2,38)} = 0.366$ ;  $p = 0.696$ ; Fig. 2C] and the escape performance [trial effect:  $F_{(2, 38)} = 1.845$ ;  $p = 0.172$ ; treatment:  $F_{(1,19)} = 0.123$ ;  $p = 0.730$ ; interaction between trial and treatment:  $F_{(2,38)} = 0.362$ ;  $p = 0.699$ ; Fig. 2D] in the ETM test. Prior administration of MK-801 also did not alter the locomotor activity in the OFT ( $t_{(19)} = -1.406$ ;  $p = 0.176$ , Table 2).

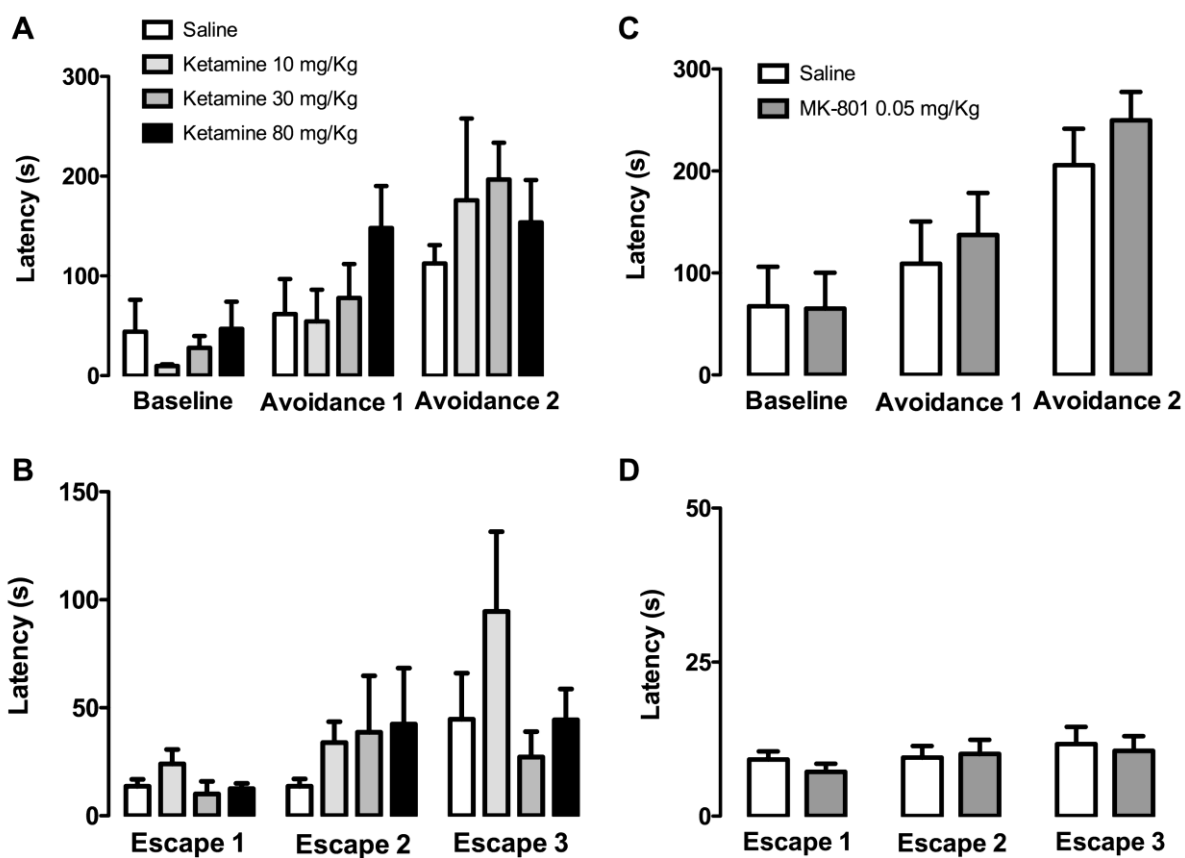

**Figure 2.** Evaluation of putative sustained effects of systemic administration (i.p.) of ketamine and MK-801 24 hours before the behavioral tasks in the elevated T-maze. **A** and **B** represent inhibitory avoidance and escape, respectively, from rats treated with ketamine 10 (n=9), 30 (n=11) and 80 mg/Kg (n= 11) or saline (control group; n= 9) 24 hours before the test; **C** and **D** represent inhibitory avoidance and escape, respectively, from rats treated with MK-801 0.05 mg/Kg (n= 11) or saline (n= 10) 24 hours before the test. The data are expressed as mean  $\pm$  SEM.

**Table 2.** Effects of ketamine and MK-801 on the distance traveled (means  $\pm$  S.E.M) by rats in the open-field.

| <b>Treatment</b>                                                            | <b>Total Distance Traveled<br/>(m)</b> |
|-----------------------------------------------------------------------------|----------------------------------------|
| <b>Sub-anesthetic doses of ketamine administered 45 min before the test</b> |                                        |
| Saline                                                                      | 17.30 $\pm$ 3.76                       |
| Ketamine 10 mg/kg                                                           | 12.98 $\pm$ 1.71                       |
| Ketamine 30 mg/kg                                                           | 17.44 $\pm$ 2.24                       |
| <b>Anesthetic dose of ketamine administered 2 h before the test</b>         |                                        |
| Saline                                                                      | 18.43 $\pm$ 1.94                       |
| Ketamine 80 mg/kg                                                           | 24.21 $\pm$ 3.13                       |
| <b>MK-801 administered 45 min before the test</b>                           |                                        |
| Saline                                                                      | 11.44 $\pm$ 2.46                       |
| MK-801 0.05 mg/kg                                                           | 14.73 $\pm$ 18.8                       |
| Mk-801 0.1 mg/kg                                                            | 18.14 $\pm$ 3.31                       |
| <b>Ketamine administered 24 hours before the test</b>                       |                                        |
| Saline                                                                      | 19.11 $\pm$ 2.18                       |
| Ketamine 10 mg/kg                                                           | 18.31 $\pm$ 2.01                       |
| Ketamine 30 mg/kg                                                           | 19.03 $\pm$ 1.87                       |
| Ketamine 80 mg/kg                                                           | 14.96 $\pm$ 1.23                       |
| <b>MK-801 administered 24 hours before the test</b>                         |                                        |
| Saline                                                                      | 16.62 $\pm$ 13.8                       |
| MK-801 0.05 mg/kg                                                           | 19.78 $\pm$ 1.73                       |

## 4 Discussion

### 4.1. Literature review

To the best of our knowledge, the present study was the first review addressing ketamine effects on preclinical anxiety/fear tests. Thus, we chose to perform a very comprehensive search which resulted in the selection of studies substantially heterogeneity. There appears to be no pattern in the outcome of the experiments that evaluated the effects of ketamine on anxiety/fear-related behaviors.

Among the factors that may result in variability of ketamine effects, it stands out the differences in the methods, such as: the type and intensity of anxiety evoked by the paradigm and previous interventions; specie/strain studied, including age and sex; type of ketamine used; great range of ketamine doses and variable schedule of treatment; variable interval between ketamine administration and behavioral evaluation.

The Research Domain Criteria (RDoC), an initiative of the National Institute of Mental Health (NIMH), proposed categories to investigate mental health that includes negative affect, positive affect and cognition (Carcone and Ruocco, 2017; Insel et al., 2010). Each of these domains can be tested by different behavioral paradigms. Most anxiety paradigms used in the studies revised herein are linked to negative affect and involve acute threat (fear), potential threat (anxiety) and sustained threat. Moreover, a common prior intervention adopted in studies investigating anxiety/fear-related behaviors is to submit the subjects to stress conditions. Finally, the sustained antidepressant-like effect of ketamine may be influenced somewhat by stress condition (Polis et al., 2019). Therefore, we compared the main effects induced by ketamine on the potential threat (anxiety) models (EPM, OFT and LDT) performed in naive versus previously stressed animals. We found a mix of outcomes (anxiolytic, anxiogenic and no effect) that was very similar in both types of conditions (naive versus stressed animals). Given that, besides the type of anxiety paradigm used in the revised studies, other factors may have contributed to the outcome of ketamine on anxiety/fear-related behaviors. As mentioned in the results section, there are a great variability of dose, number of administration and even interval between administration of ketamine and test exposure.

Regarding published studies involving acute or sustained threat (fear), about half of them reported an anxiolytic-like effect of ketamine in behavioral responses such as freezing. In contrast, all the 3 experiments that evaluated social interaction as a consequence of acute or



sustained stress reported an anxiogenic-like effect of ketamine. Noteworthy, most of these studies did not evaluate ketamine effects considering resilient versus stress-vulnerable animals. As proposed by Musazzi and coworkers (Musazzi et al., 2018), investigate ketamine effects on resilient versus stress-vulnerable animals could increase accuracy of results.

In general, paradigms of acute or sustained threat have been related to PTSD (Frاندreau and Toth, 2017). There are few studies that evaluated ketamine effects on patients diagnosed with PTSD or with symptoms of PTSD (Banov et al., 2019; Liriano et al., 2019). Although some of these studies have shown that ketamine may be an option for PTSD treatment (Albott et al., 2018; Feder et al., 2014), other studies described possible side effects of ketamine that could worsen PTSD symptoms (Schönenberg et al., 2008, 2005). Of note, this last study mentioned found that accident victims treated with S-ketamine exhibited greater symptoms of dissociation, re-experiencing and avoidance than those treated with racemic ketamine (Schönenberg et al., 2005). On the other hand, depressed patients with a history of PTSD who received a single racemic ketamine infusion did not experience a clinically significant increase in dissociative or anxiety symptoms (Zeng et al., 2013). These conflicting and pending results highlight the need for further studies comparing S-ketamine and R-ketamine in preclinical protocols of acute threat as well as in patients diagnosed with PTSD with and without comorbidities, such as depression.

In contrast, from the 12 experiments that evaluated ketamine effects on NSF, 11 reported an anxiolytic-like effect of ketamine and only 1 report no effect. The NSF is based on the inhibition of feeding behavior generally caused by a novel environment (Blasco-Serra et al., 2017). The NSF has been considered an animal model of anxiety since it measures a conflict between the anxiogenic environment and hunger-induced behavior, which is sensitive to anxiolytic drugs (Cryan and Sweeney, 2011; Dulawa and Hen, 2005; Merali et al., 2003; Shephard and Broadhurst, 1982). On the other hand, some authors suggest that NSF could be an animal model of depression by assessing anhedonia and detecting the effects of chronic, but not acute treatment with antidepressant drugs (Dulawa and Hen, 2005; Nestler and Hyman, 2010; Powell et al., 2012). Thus, one possibility is that the test assesses antidepressant drug effects by detecting their anxiolytic effects (Ramaker and Dulawa, 2017). Within this context, many of the selected studies by the present review reported the effect of ketamine on NSF as a fast-acting antidepressant-like effect. Of note, some of the selected studies reported that ketamine had no effect on distinct anxiety-like behaviors (Autry et al., 2011; Brachman et al., 2016; Carrier and Kabbaj, 2013; Pham et al., 2017) while others

reported that ketamine had an antidepressant-like effect in distinct depression-like behaviors (Li et al., 2010; Lin et al., 2016; Soumier et al., 2016; Zanos et al., 2015). In this way, the total data set on the NSF is most consistent with an antidepressant-like effect of ketamine rather than an anxiolytic-like effect.

The direction of ketamine effects on anxiety/fear-related behaviors might also be influenced by the so-called publication bias. There is some evidence suggesting that negative results are underreported/unpublished (Driessen et al., 2015; Mlinarić et al., 2017). In fact, the risk of publication bias in both, pre-clinical (Mohammad et al., 2016) and clinical studies (Turner et al., 2008), have already been identified. Therefore, there is much space to improve pre-clinical research and reduce the risk of bias. For example, a good practice is to register, in advance, the protocols and experimental design of projects in online repositories such as [www.preclinicaltrials.eu](http://www.preclinicaltrials.eu), to reduce risk of bias (Jansen et al., 2014; Tillmann, 2017).

The vast majority of the revised articles did not consider gender differences in their experiments. Although it is not completely understood whether ketamine has sex-specific effects (Chang et al., 2018; Herzog et al., 2019), some evidence suggests more pronounced biochemical and behavioral effects of ketamine in females (Carrier and Kabbaj, 2013; Dossat et al., 2018; Franceschelli et al., 2015; Guarraci et al., 2018; Saland and Kabbaj, 2018; Thelen et al., 2019, 2016). It is noteworthy that women are twice more likely than men to experience an anxiety disorder over their lifespan (Bandelow and Michaelis, 2015; Craske et al., 2017; Hantsoo and Epperson, 2017; Remes et al., 2016). Altogether, these data highlight the importance of filling this gap, which means to produce further evaluation of ketamine effects on anxiety/fear-related behavior in females.

Regarding the quality of the selected studies, some points deserve to be mentioned. Ketamine is a chiral anesthetic drug that is usually marketed as a racemic mixture containing equal amounts of two enantiomers, S- and R-ketamine. Meanwhile, pharmacokinetic and pharmacodynamic differences between the ketamine enantiomers have been described (Muller et al., 2016). For instance, S-ketamine has about a 2-4-fold greater affinity for the NMDA and opioid receptors, higher anesthetic potency and maybe fewer adverse effects than R-ketamine (Andrade, 2017; Domino, 2010; Kohrs and Durieux, 1998; Muller et al., 2016; White et al., 1980). In contrast, R-ketamine seems to have a longer lasting antidepressant-like effect than S-ketamine possibly mediated by different molecular mechanisms (Fukumoto et al., 2017; Yang et al., 2018, 2015; Zhang et al., 2014). Surprisingly, most of the selected studies in this review were inaccurate in identifying the type of ketamine that was used and

some of them did not even describe the manufacturer. Additionally, in our review, in 3 of the studies that specifically investigated the effects of S-ketamine on anxiety/fear-related behaviors, 2 identified an anxiogenic-like effect of the drug. From this, it is important that future studies reduce the risk of bias by clearly describing the type of ketamine used and its manufacturer. Also, future studies should address specifically the effects of different enantiomers of ketamine on anxiety/fear-related behaviors.

Another issue about the quality of the selected studies is the absence of detailed information about the interval between ketamine administration and behavioral evaluation. This observation is in line with previous evidence suggesting that the majority of publications fail to include key information (Avey et al., 2016; Kilkenny et al., 2009; Macleod et al., 2015). Inaccurate or incomplete reporting has potential scientific, ethical, and economic implications. Collectively, these data strengthen the importance of following guidelines such as those of PREPARE (Planning Research and Experimental Procedures on Animals: Recommendations for Excellence)(Smith et al., 2018) and ARRIVE (Animals in Research: Reporting In Vivo Experiments) (Kilkenny et al., 2010; Percie et al., 2019) initiative to increase reproducibility and to reduce publication bias in pre-clinical studies.

Finally, it is important to mention some limitations of our review. We limited our search to the electronic database PubMed and to English-language published data. We also did not perform a meta-analysis of the data.

#### **4.2. New findings**

From the evidence gathered in our review, we identified an important gap in the literature regarding ketamine effects in fear-related behaviors associated to PD. Therefore, we evaluated the effect of ketamine in an animal model related to PD. Overall, we found that: 1) racemic ketamine, at sub-anesthetic and anesthetic doses, did not induce acute and/or sustained anxiolytic/panicolytic-like effects in rats exposed to the ETM; 2) MK-801, another non-competitive NMDA receptor antagonist, induced an acute, but not sustained anxiolytic-like effect in rats exposed to the ETM. The reported effects do not seem to be due to locomotor activity changes, as both drugs, at any administered dose and interval of evaluation, did not influence open field performance. Despite this, the anesthetic dose of ketamine increased baseline latency during inhibitory avoidance, suggesting at least a residual depressor effect.

The lack of ketamine effects on the ETM rats performance, acutely or 24 h after its administration, reinforces the controversial findings reported in previous studies, as described in table 1. For example, anesthetic doses of ketamine induced anxiolytic-like (Hayase et al., 2006), anxiogenic-like (Morena et al., 2017) or no effect (Magalhaes et al., 2017) in different tests of anxiety. Regarding sub-anesthetic doses of ketamine, similar mix of outcomes has been previously reported (as detailed in Table 1). Although the reasons for these discrepant results are unknown, they may be attributed to differences in the behavioral paradigms, animal species and interval between ketamine treatment and test. For instance, the genetic background of a strain is among the several factors that may affect the behavioral responses of the animals to a drug (An et al., 2011; Võikar et al., 2001). Ketamine 30 mg/kg produced an anxiolytic-like effect on male ICR mice (Hayase et al., 2006) and no effect on male 129S6/SvEvTac mice (Brachman et al., 2016) submitted to the EPM. Ketamine 10 mg/kg induced an anxiolytic-like effect in NSF, but did not alter the behavior in the EPM and in the context and cued fear conditioning (Autry et al., 2011). One possible explanation is that different animal models of anxiety can recruit distinct neural substrates and, therefore, produce contradictory results.

We also cannot exclude that ketamine effects on anxiety-like behaviors are influenced by the ketamine enantiomer. As described in the previous section, S- and R-ketamine have different neurochemical and behavioural effects and in the present study, we evaluated a racemic mixture of ketamine on behavioral tests. Thus, we cannot exclude the possibility that an specific enantiomer of ketamine has a potential panicolytic-like effect.

Noteworthy, the lowest tested dose of MK-801, a highly selective NMDA receptor antagonist (Wong et al., 1986), impaired inhibitory avoidance, but not escape behavior, suggesting an acute anxiolytic-like effect. This result is in agreement with results observed in other studies that evaluated the effect of MK-801 in animal models of anxiety (Adamec et al., 1998; Engin et al., 2009; Karcz-Kubicha et al., 1997; Refsgaard et al., 2017). Additionally, the anxiolytic-like effect of MK-801 was not sustained, as it was not detected 24 h later. This absence of sustained effect of MK-801 in the ETM is consistent with the absence of sustained effects in the EPM (Hill et al., 2015) and in the forced swimming test (Autry et al., 2011).

One speculative explanation for the contradictory effects of ketamine and MK-801, both NMDA receptor antagonists, is that ketamine, different from MK-801, is a multimodal-acting drug. Ketamine and its active metabolites can act beyond the NMDA receptor, several other targets such as opioid and serotonergic receptors, calcium, sodium and chloride channels, 5-

HT transporter, among others (du Jardin et al., 2016; Kapur and Seeman, 2001; Salat et al., 2015). In this sense, it is possible that ketamine and its metabolites could act on different types of receptors with opposite transduction mechanisms that would prevent the appearance of an anxiolytic-like effect.

Another possibility is a differential modulation of glutamate release by ketamine and MK-801 in the prefrontal cortex. Systemic ketamine administration (10-30 mg/kg) may increase extracellular glutamate levels in the prefrontal cortex (Lorrain et al., 2003; Moghaddam et al., 1997), which may shift the balance between AMPA-to-NMDA receptors-mediated neurotransmission and contribute to the antidepressant-like effect of ketamine (Maeng et al., 2008; Zanos and Gould, 2018). Additionally, there is some evidence that the activation of AMPA receptors could increase anxiety (Alt et al., 2006; Andreasen et al., 2015; Fitzpatrick et al., 2016). Under these circumstances, it is possible that the activation of AMPA receptors mediated by increased ketamine induced-glutamate neurotransmission would increase anxiety, an effect that would counteract the possible anxiolytic-like effect of ketamine mediated by blocking the NMDA receptors. On the other hand, MK-801 increased extracellular glutamate levels in the prefrontal cortex only at high doses (0.3-0.6 mg/kg) (Roemaker et al., 2012; Zuo et al., 2006). Consequently, a very low dose of MK-801 like the one used in our study (0.05 mg/kg) probably did not increase glutamate levels, which resulted in an anxiolytic-like effect mediated by the exclusive NMDA receptors blockade. This hypothesis, however, warrants further investigation and it is beyond the scope of the present study.

Meanwhile, a limitation of our study is that we evaluated ketamine and MK-801 effects only in one animal model related to PD. Given that, future studies should evaluate ketamine and MK-801 effects in other animal models of panic, such as the electrical stimulation of the dorsal periaqueductal grey matter (Moreira et al., 2013; Schenberg et al., 2001).

In summary, the present study provided an overview on the current state of knowledge about ketamine effects on anxiety/fear-related behaviors. At the same time, sub-anesthetic and anesthetic doses of ketamine had no effect on anxiety or panic-related behaviors in the ETM. The individual effects of R-ketamine and S-ketamine on anxiety/fear-related behaviors, including sex differences, should be further addressed.

## Acknowledgements

GPS received a master fellowship from Fundação de Apoio à Pesquisa e Inovação do Espírito Santo (FAPES) and received a doctoral research fellowship from Conselho Nacional de Desenvolvimento Científico e Tecnológico (CNPq) and now receives from Fundação de Amparo à Pesquisa do Estado de São Paulo (FAPESP; Grant#2018/12119-6; #2017/26815-1). SFSO and MMS received undergraduate research fellowships from UFES, DER is recipient of a fellowship from the Incentive Program to Post-Doctorate Attraction of the University of São Paulo, Brazil, and RA and SRLJ receive productivity fellowships from CNPq. This research did not receive any specific grant from funding agencies in the public, commercial, or not-for-profit sectors.

## Conflicts of Interest

The authors declare no conflicts of interest.

## References

- Adamec, R.E., Burton, P., Shallow, T., Budgell, J., 1998. NMDA receptors mediate lasting increases in anxiety-like behavior produced by the stress of predator exposure - Implications for anxiety associated with posttraumatic stress disorder. *Physiol. Behav.* 65, 723–737. doi:10.1016/S0031-9384(98)00226-1
- Albott, C.S., Lim, K.O., Forbes, M.K., Erbes, C., Tye, S.J., Grabowski, J.G., Thuras, P., Batres-Y-Carr, T.M., Wels, J., Shiroma, P.R., 2018. Efficacy, safety, and durability of repeated ketamine infusions for comorbid posttraumatic stress disorder and treatment-resistant depression. *J. Clin. Psychiatry* 79, 17m11634. doi:10.4088/JCP.17m11634
- Alt, A., Weiss, B., Ogden, A.M., Li, X., Gleason, S.D., Calligaro, D.O., Bleakman, D., Witkin, J.M., 2006. In vitro and in vivo studies in rats with LY293558 suggest AMPA/kainate receptor blockade as a novel potential mechanism for the therapeutic treatment of anxiety disorders. *Psychopharmacology (Berl)*. 185, 240–247. doi:10.1007/s00213-005-0292-0
- Amann, L.C., Halene, T.B., Ehrlichman, R.S., Luminais, S.N., Ma, N., Abel, T., Siegel, S.J., 2009. Chronic ketamine impairs fear conditioning and produces long-lasting reductions in auditory evoked potentials. *Neurobiol. Dis.* 35, 311–317. doi:10.1016/j.nbd.2009.05.012

- An, X., Zou, J., Wu, R., Yang, Y., Tai, F., 2011. Strain and Sex Differences in Anxiety-Like and Social Behaviors in C57BL / 6J and BALB / cJ Mice. *Exp. Anim.* 60, 111–123.
- Andrade, C., 2017. Ketamine for depression, 3: Does chirality matter? *J. Clin. Psychiatry* 78, e674–e677. doi:10.4088/JCP.17f11681
- Andreasen, J.T., Fitzpatrick, C.M., Larsen, M., Skovgaard, L., Nielsen, S.D., Clausen, R.P., Troelsen, K., Pickering, D.S., 2015. Differential role of AMPA receptors in mouse tests of antidepressant and anxiolytic action. *Brain Res.* 1601, 117–126. doi:10.1016/j.brainres.2015.01.001
- Autry, A.E., Adachi, M., Nosyreva, E., Na, E.S., Los, M.F., Cheng, P., Kavalali, E.T., Monteggia, L.M., 2011. NMDA receptor blockade at rest triggers rapid behavioural antidepressant responses. *Nature* 475, 91–95. doi:10.1038/nature10130
- Averill, L.A., Purohit, P., Averill, C.L., Boesl, M.A., Krystal, J.H., Abdallah, C.G., 2017. Glutamate dysregulation and glutamatergic therapeutics for PTSD: Evidence from human studies. *Neurosci. Lett.* 649, 147–155. doi:10.1016/j.neulet.2016.11.064
- Avey, M.T., Moher, D., Sullivan, K.J., Fergusson, D., Griffin, G., Grimshaw, J.M., Hutton, B., Lalu, M.M., Macleod, M., Marshall, J., Mei, S.H.J., Rudnicki, M., Stewart, D.J., Turgeon, A.F., McIntyre, L., 2016. The devil is in the details: Incomplete reporting in preclinical animal research. *PLoS One* 11, 1–13. doi:10.1371/journal.pone.0166733
- Babar, E., Özgünen, T., Melik, E., Polat, S., Akman, H., Özgünen, T., Melik, E., Polat, S., Akman, H., 2001. Effects of ketamine on different types of anxiety/fear and related memory in rats with lesions of the median raphe nucleus. *Eur. J. Pharmacol.* 431, 315–320. doi:10.1016/S0014-2999(01)01340-1
- Bandelow, B., Michaelis, S., 2015. Epidemiology of anxiety disorders in the 21st century. *Dialogues Clin. Neurosci.* 17, 327–335.
- Bandelow, B., Michaelis, S., Wedekind, D., 2017. Treatment of anxiety disorders. *Dialogues Clin. Neurosci.* 19, 93–107. doi:10.1007/s15006-018-0025-z
- Banov, M.D., Young, J.R., Dunn, T., Szabo, S.T., 2019. Efficacy and safety of ketamine in the management of anxiety and anxiety spectrum disorders: a review of the literature. *CNS Spectr.* 1–12. doi:10.1017/S1092852919001238
- Berman, R.M., Cappiello, A., Anand, A., Oren, D.A., Heninger, G.R., Charney, D.S., Krystal, J.H., 2000. Antidepressant effects of ketamine in depressed patients. *Biol. Psychiatry* 47, 351–354. doi:10.1016/S0006-3223(99)00230-9
- Blasco-Serra, A., González-Soler, E.M., Cervera-Ferri, A., Teruel-Martí, V., Valverde-Navarro, A.A., 2017. A standardization of the novelty-suppressed feeding test protocol

- in rats. *Neurosci. Lett.* 658, 73–78. doi:10.1016/j.neulet.2017.08.019
- Blier, P., Abbott, F. V., 2001. Putative mechanisms of action of antidepressant drugs in affective and anxiety disorders and pain. *J. Psychiatry Neurosci.* 26, 37–43.
- Bourin, M., 2015. Animal models for screening anxiolytic-like drugs: a perspective. *Dialogues Clin. Neurosci.* 17, 295–303.
- Brachman, R.A., McGowan, J.C., Perusini, J.N., Lim, S.C., Pham, T.H., Faye, C., Gardier, A.M., Mendez-David, I., David, D.J., Hen, R., Denny, C.A., 2016. Ketamine as a Prophylactic Against Stress-Induced Depressive-Like Behavior. *Biol. Psychiatry* 79, 776–786. doi:10.1016/j.biopsych.2015.04.022
- Burgdorf, J., Zhang, X., Nicholson, K.L., Balster, R.L., David Leander, J., Stanton, P.K., Gross, A.L., Kroes, R. a, Moskal, J.R., 2013. GLYX-13, a NMDA receptor glycine-site functional partial agonist, induces antidepressant-like effects without ketamine-like side effects. *Neuropsychopharmacology* 38, 729–742. doi:10.1038/npp.2012.246
- Burhans, L.B., Smith-Bell, C.A., Schreurs, B.G., 2017. Effects of systemic glutamatergic manipulations on conditioned eyeblink responses and hyperarousal in a rabbit model of post-Traumatic stress disorder. *Behav. Pharmacol.* 28, 565–577. doi:10.1097/FBP.0000000000000333
- Carcone, D., Ruocco, A.C., 2017. Six Years of Research on the National Institute of Mental Health’s Research Domain Criteria (RDoC) Initiative: A Systematic Review. *Front. Cell. Neurosci.* 11, 1–8. doi:10.3389/fncel.2017.00046
- Carrier, N., Kabbaj, M., 2013. Sex differences in the antidepressant-like effects of ketamine. *Neuropharmacology* 70, 27–34. doi:10.1016/j.neuropharm.2012.12.009
- Chang, L., Toki, H., Qu, Y., Fujita, Y., Mizuno-Yasuhira, A., Yamaguchi, J.I., Chaki, S., Hashimoto, K., 2018. No sex-specific differences in the acute antidepressant actions of (R)-ketamine in an inflammation model. *Int. J. Neuropsychopharmacol.* 21, 932–937. doi:10.1093/ijnp/pyy053
- Craske, M.G., Stein, M.B., Eley, T.C., Milad, M.R., Holmes, A., Rapee, R.M., Wittchen, H.-U.U., 2017. Anxiety disorders. *Nat. Rev. Dis. Prim.* 3, 17024. doi:10.1038/nrdp.2017.24
- Cryan, J.F., Sweeney, F.F., 2011. The age of anxiety: Role of animal models of anxiolytic action in drug discovery. *Br. J. Pharmacol.* doi:10.1111/j.1476-5381.2011.01362.x
- De Campos, E.G., Bruni, A.T., De Martinis, B.S., 2015. Ketamine induces anxiolytic effects in adult zebrafish: A multivariate statistics approach. *Behav. Brain Res.* 292, 537–546. doi:10.1016/j.bbr.2015.07.017
- Diazgranados, N., Ibrahim, L., Brutsche, N.E., Newberg, A., Kronstein, P., Khalife, S.,



- Kammerer, W.A., Quezado, Z., Luckenbaugh, D.A., Salvadore, G., Machado-Vieira, R., Manji, H.K., Zarate, C. a., 2010. A Randomized Add-on Trial of an N-methyl-D-aspartate Antagonist in Treatment-Resistant Bipolar Depression. *Arch. Gen. Psychiatry* 67, 793–802.
- Domino, E.F., 2010. Taming the ketamine tiger. *Anesthesiology* 113, 678–686. doi:10.1097/ALN.0b013e3181ed09a2
- Dossat, A.M., Wright, K.N., Strong, C.E., Kabbaj, M., 2018. Behavioral and biochemical sensitivity to low doses of ketamine: Influence of estrous cycle in C57BL/6 mice. *Neuropharmacology* 130, 30–41. doi:10.1016/j.neuropharm.2017.11.022
- Driessen, E., Hollon, S.D., Bockting, C.L.H., Cuijpers, P., Turner, E.H., Lu, L., 2015. Does publication bias inflate the apparent efficacy of psychological treatment for major depressive disorder? A systematic review and meta-analysis of US National Institutes of health-funded trials. *PLoS One* 10, 1–23. doi:10.1371/journal.pone.0137864
- du Jardin, K.G., Muller, H.K., Elfving, B., Dale, E., Wegener, G., Sanchez, C., 2016. Potential involvement of serotonergic signaling in ketamine's antidepressant actions: A critical review. *Prog. Neuro-Psychopharmacology Biol. Psychiatry* 71, 27–38. doi:10.1016/j.pnpbp.2016.05.007
- Duclot, F., Perez-Taboada, I., Wright, K.N., Kabbaj, M., 2016. Prediction of individual differences in fear response by novelty seeking, and disruption of contextual fear memory reconsolidation by ketamine. *Neuropharmacology* 109, 293–305. doi:10.1016/j.neuropharm.2016.06.022
- Dulawa, S.C., Hen, R., 2005. Recent advances in animal models of chronic antidepressant effects: The novelty-induced hypophagia test. *Neurosci. Biobehav. Rev.* 29, 771–783. doi:10.1016/j.neubiorev.2005.03.017
- Engin, E., Treit, D., Dickson, C.T., 2009. Anxiolytic- and antidepressant-like properties of ketamine in behavioral and neurophysiological animal models. *Neuroscience* 161, 359–369. doi:10.1016/j.neuroscience.2009.03.038
- Feder, A., Parides, M.K., Murrough, J.W., Perez, A.M., Morgan, J.E., Saxena, S., Kirkwood, K., Lapidus, K.A.B., 2014. Efficacy of Intravenous Ketamine for Treatment of Chronic Posttraumatic Stress Disorder A Randomized Clinical Trial. *JAMA Psychiatry* 71, 681–688. doi:10.1001/jamapsychiatry.2014.62
- Ferraguti, F., 2018. Metabotropic glutamate receptors as targets for novel anxiolytics. *Curr. Opin. Pharmacol.* 38, 37–42. doi:10.1016/j.coph.2018.02.004
- Fitzpatrick, C.M., Larsen, M., Madsen, L.H., Caballero-Puntiverio, M., Pickering, D.S.,

- Clausen, R.P., Andreasen, J.T., 2016. Positive allosteric modulation of  $\alpha$ -amino-3-hydroxy-5-methyl-4-isoxazolepropionic acid glutamate receptors differentially modulates the behavioural effects of citalopram in mouse models of antidepressant and anxiolytic action. *Behav. Pharmacol.* 27, 549–555. doi:10.1097/FBP.0000000000000243
- Fraga, D.B., Olescowicz, G., Moretti, M., Siteneski, A., Tavares, M.K., Azevedo, D., Colla, A.R.S., Rodrigues, A.L.S., 2018. Anxiolytic effects of ascorbic acid and ketamine in mice. *J. Psychiatr. Res.* 100, 16–23. doi:10.1016/j.jpsychires.2018.02.006
- Franceschelli, A., Sens, J., Herchick, S., Thelen, C., Pitychoutis, P.M., 2015. Sex differences in the rapid and the sustained antidepressant-like effects of ketamine in stress-naïve and “depressed” mice exposed to chronic mild stress. *Neuroscience* 290, 49–60. doi:10.1016/j.neuroscience.2015.01.008
- Frantreau, E.I., Toth, M., 2017. Animal Models of PTSD: A Critical Review. *Curr. Top. Behav. Neurosci.* 38, 47–68. doi:10.1007/7854
- Fukumoto, K., Iijima, M., Chaki, S., 2014. Serotonin-1A receptor stimulation mediates effects of a metabotropic glutamate 2/3 receptor antagonist, 2S-2-amino-2-(1S,2S-2-carboxycycloprop-1-yl)-3-(xanth-9-yl)propanoic acid (LY341495), and an N-methyl-D-aspartate receptor antagonist, ketamine, in th. *Psychopharmacology (Berl)*. 231, 2291–2298. doi:10.1007/s00213-013-3378-0
- Fukumoto, K., Toki, H., Iijima, M., Hashihayata, T., Yamaguchi, J., Hashimoto, K., Chaki, S., 2017. Antidepressant Potential of ( R ) -Ketamine in Rodent Models : Comparison with ( S ) -Ketamine. *J. Pharmacol. Exp. Ther.* 361, 9–16.
- Girgenti, M.J.J., Ghosal, S., Lopresto, D., Taylor, J.R.R., Duman, R.S.S., 2017. Ketamine accelerates fear extinction via mTORC1 signaling. *Neurobiol. Dis.* 100, 1–8. doi:10.1017/S0950268814002131.Tuberculosis
- Glue, P., Medlicott, N.J., Harland, S., Neehoff, S., Anderson-Fahey, B., Le Nedelec, M., Gray, A., McNaughton, N., 2017. Ketamine’s dose-related effects on anxiety symptoms in patients with treatment refractory anxiety disorders. *J. Psychopharmacol.* 31, 1302–1305. doi:10.1177/0269881117705089
- Glue, P., Neehoff, S.M., Medlicott, N.J., Gray, A., Kibby, G., McNaughton, N., 2018. Safety and efficacy of maintenance ketamine treatment in patients with treatment-refractory generalised anxiety and social anxiety disorders. *J. Psychopharmacol.* 32, 663–667. doi:10.1177/0269881118762073
- Griebel, G., Holmes, A., 2013. 50 years of hurdles and hope in anxiolytic drug discovery.

- Nat. Rev. Drug Discov. 12, 667–87. doi:10.1038/nrd4075
- Guarraci, F.A., Gonzalez, C.M.F., Lucero, D., Womble, P.D., Abdel-Rahim, H., DeVore, J., Kunkel, M.N., Quadlander, E., Stinnett, M., Boyette-Davis, J., 2018. The effects of ketamine on sexual behavior, anxiety, and locomotion in female rats. *Pharmacol. Biochem. Behav.* 165, 36–44. doi:10.1016/j.pbb.2017.12.004
- Hantsoo, L., Epperson, C.N., 2017. Anxiety Disorders Among Women: A Female Lifespan Approach. *Focus (Madison)*. 15, 162–172. doi:10.1176/appi.focus.20160042
- Harkin, A., Connor, T.J., Walsh, M., St John, N., Kelly, J.P., 2003. Serotonergic mediation of the antidepressant-like effects of nitric oxide synthase inhibitors. *Neuropharmacology* 44, 616–623. doi:10.1016/S0028-3908(03)00030-3
- Harro, J., 2018. Animals, anxiety, and anxiety disorders: How to measure anxiety in rodents and why. *Behav. Brain Res.* 352, 81–93. doi:10.1016/j.bbr.2017.10.016
- Harvey, B.H., Shahid, M., 2012. Metabotropic and ionotropic glutamate receptors as neurobiological targets in anxiety and stress-related disorders: focus on pharmacology and preclinical translational models. *Pharmacol. Biochem. Behav.* 100, 775–800. doi:10.1016/j.pbb.2011.06.014
- Hayase, T., Yamamoto, Y., Yamamoto, K., 2006. Behavioral effects of ketamine and toxic interactions with psychostimulants. *BMC Neurosci.* 7, 25. doi:10.1186/1471-2202-7-25
- Herzog, D.P., Wegener, G., Lieb, K., Müller, M.B., Treccani, G., 2019. Decoding the mechanism of action of rapid-acting antidepressant treatment strategies: Does gender matter? *Int. J. Mol. Sci.* 20, 949. doi:10.3390/ijms20040949
- Hill, X.L., Richeri, A., Scorza, C., 2015. Measure of anxiety-related behaviors and hippocampal BDNF levels associated to the amnesic effect induced by MK-801 evaluated in the modified elevated plus-maze in rats. *Physiol. Behav.* 147, 359–363. doi:10.1016/j.physbeh.2015.05.013
- Holubova, K., Kleteckova, L., Skurlova, M., Ricny, J., Stuchlik, A., Vales, K., 2016. Rapamycin blocks the antidepressant effect of ketamine in task-dependent manner. *Psychopharmacology (Berl)*. 233, 2077–2097. doi:10.1007/s00213-016-4256-3
- Huettner, J.E., Bean, B.P., 1988. Block of N-methyl-D-aspartate-activated current by the anticonvulsant MK-801: Selective binding to open channels. *Proc. Natl. Acad. Sci. U. S. A.* 85, 1307–1311. doi:10.1073/pnas.85.4.1307
- Insel, T., Cuthbert, B., Garvey, M., Heinssen, R., Pine, D., Quinn, K., Sanislow, C., Wang, P., 2010. Research Domain Criteria ( RDoC ): Toward a. *Am. J. Psychiatry Online* 748–751. doi:10.1176/appi.ajp.2010.09091379

- Irwin, S.A., Iglewicz, A., Nelesen, R.A., Lo, J.Y., Carr, C.H., Romero, S.D., Lloyd, L.S., 2013. Daily oral ketamine for the treatment of depression and anxiety in patients receiving hospice care: a 28-day open-label proof-of-concept trial. *J. Palliat. Med.* 16, 958–65. doi:10.1089/jpm.2012.0617
- Ito, W., Erisir, A., Morozov, A., 2015. Observation of Distressed Conspecific as a Model of Emotional Trauma Generates Silent Synapses in the Prefrontal-Amygdala Pathway and Enhances Fear Learning, but Ketamine Abolishes those Effects. *Neuropsychopharmacology* 40, 2536–2545. doi:10.1038/npp.2015.100
- Jansen, S.J., Doevendans, P.A., Chamuleau, S.A.J., 2014. All preclinical trials should be registered in advance in an online registry. *Eur. J. Clin. Invest.* 44, 892–893. doi:10.1111/eci.12299
- Jiang, Y., Wang, Y., Sun, X., Lian, B., Sun, H., Wang, G., Du, Z., Li, Q., Sun, L., 2017. Short- and long-term antidepressant effects of ketamine in a rat chronic unpredictable stress model. *Brain Behav.* 7, 1–11. doi:10.1002/brb3.749
- Juven-Wetzler, A., Cohen, H., Kaplan, Z., Kohen, A., Porat, O., Zohar, J., 2014. Immediate ketamine treatment does not prevent posttraumatic stress responses in an animal model for PTSD. *Eur. Neuropsychopharmacol.* 24, 469–479. doi:10.1016/j.euroneuro.2013.08.007
- Kapur, S., Seeman, P., 2001. Ketamine has equal affinity for NMDA receptors and the high-affinity state of the dopamine D2 receptor [multiple letter]. *Biol. Psychiatry* 49, 954–957. doi:10.1016/S0006-3223(01)01110-6
- Karcz-Kubicha, M., Jessa, M., Nazar, M., Plaznik, A., Hartmann, S., Parsons, C.G., Danysz, W., 1997. Anxiolytic activity of glycine-B antagonists and partial agonists - No relation to intrinsic activity in the patch clamp. *Neuropharmacology* 36, 1355–1367. doi:10.1016/S0028-3908(97)00130-5
- Kilic, F.S., Ismailoglu, S., Kaygisiz, B., Oner, S., 2014. Effects of single and combined gabapentin use in elevated plus maze and forced swimming tests. *Acta Neuropsychiatr.* 26, 307–314. doi:10.1017/neu.2014.17
- Kilkenny, C., Browne, W.J., Cuthill, I.C., Emerson, M., Altman, D.G., 2010. Improving bioscience research reporting: The arrive guidelines for reporting animal research. *PLoS Biol.* 8, 1–5. doi:10.3390/ani4010035
- Kilkenny, C., Parsons, N., Kadyszewski, E., Festing, M.F.W., Cuthill, I.C., Fry, D., Hutton, J., Altman, D.G., 2009. Survey of the Quality of Experimental Design, Statistical Analysis and Reporting of Research Using Animals. *PLoS One* 4, 1–11.

doi:10.1371/journal.pone.0007824

- Koen, N., Stein, D.J., 2011. Pharmacotherapy of Anxiety Disorders: A critical review. *Dialogues Clin. Neurosci.* 13, 423–437.
- Kohrs, R., Durieux, M.E., 1998. Ketamine: teaching an old drug new tricks. *Anesth. Analg.* 87, 1186–1193. doi:<https://doi.org/10.1213/00000539-199811000-00039>
- Lezak, K.R., Missig, G., Carlezon, W.A., 2017. Behavioral methods to study anxiety in rodents. *Dialogues Clin. Neurosci.* 19, 181–191.
- Li, N., Lee, B., Liu, R.J., Banasr, M., Dwyer, J.M., Iwata, M., Li, X.Y., Aghajanian, G., Duman, R.S., 2010. mTOR-dependent synapse formation underlies the rapid antidepressant effects of NMDA antagonists. *Science* (80-. ). 329, 959–964. doi:10.1126/science.1190287
- Li, N., Liu, R.J., Dwyer, J.M., Banasr, M., Lee, B., Son, H., Li, X.Y., Aghajanian, G., Duman, R.S., 2011. Glutamate N-methyl-D-aspartate receptor antagonists rapidly reverse behavioral and synaptic deficits caused by chronic stress exposure. *Biol. Psychiatry* 69, 754–761. doi:10.1016/j.biopsych.2010.12.015
- Lin, J.C., Lee, M.Y., Chan, M.H., Chen, Y.C., Chen, H.H., 2016. Betaine enhances antidepressant-like, but blocks psychotomimetic effects of ketamine in mice. *Psychopharmacology (Berl)*. 233, 3223–3235. doi:10.1007/s00213-016-4359-x
- Liriano, F., Hatten, C., Schwartz, T.L., 2019. Ketamine as treatment for post-traumatic stress disorder: a review. *Drugs Context* 8, 1–7. doi:10.7573/dic.212305
- Liu, W.-X., Wang, J., Xie, Z.-M., Xu, N., Zhang, G.-F., Jia, M., Zhou, Z.-Q., Hashimoto, K., Yang, J.-J., 2016. Regulation of glutamate transporter 1 via BDNF-TrkB signaling plays a role in the anti-apoptotic and antidepressant effects of ketamine in chronic unpredictable stress model of depression. *Psychopharmacology (Berl)*. 233, 405–415. doi:10.1007/s00213-015-4128-2
- Lorrain, D.S., Baccei, C.S., Bristow, L.J., Anderson, J.J., Varney, M. a., 2003. Effects of ketamine and N-methyl-D-aspartate on glutamate and dopamine release in the rat prefrontal cortex: Modulation by a group II selective metabotropic glutamate receptor agonist LY379268. *Neuroscience* 117, 697–706. doi:10.1016/S0306-4522(02)00652-8
- Loss, C.M., Córdova, S.D., De Oliveira, D.L., 2012. Ketamine reduces neuronal degeneration and anxiety levels when administered during early life-induced status epilepticus in rats. *Brain Res.* 1474, 110–117. doi:10.1016/j.brainres.2012.07.046
- Macleod, M.R., Lawson McLean, A., Kyriakopoulou, A., Serghiou, S., de Wilde, A., Sherratt, N., Hirst, T., Hemblade, R., Babor, Z., Nunes-Fonseca, C., Potluru, A.,

- Thomson, A., Baginskitaie, J., Egan, K., Vesterinen, H., Currie, G.L., Churilov, L., Howells, D.W., Sena, E.S., 2015. Risk of Bias in Reports of In Vivo Research: A Focus for Improvement. *PLoS Biol.* 13, 1–12. doi:10.1371/journal.pbio.1002273
- Maeng, S., Zarate Jr, C.A., Du, J., Schloesser, R.J., McCammon, J., Chen, G., Manji, H.K., 2008. Cellular mechanisms underlying the antidepressant effects of ketamine: role of alpha-amino-3-hydroxy-5-methylisoxazole-4-propionic acid receptors. *Biol. Psychiatry* 63, 349–352. doi:10.1016/j.biopsych.2007.05.028
- Magalhaes, A., Valentim, A., Venancio, C., Pereira, M., Melo, P., Summavielle, T., Antunes, L., 2017. Ketamine alone or combined with midazolam or dexmedetomidine does not affect anxiety-like behaviours and memory in adult Wistar rats. *Lab. Anim.* 51, 147–159. doi:10.1177/0023677216652380
- McCloud, T., Caddy, C., Jochim, J., Rendell, J., Diamond, P., Shuttleworth, C., Brett, D., Amit, B., McShane, R., Hamadi, R., Hawton, K., Cipriani, A., 2015. Ketamine and other glutamate receptor modulators for depression in adults. *Cochrane Database Syst. Rev.* doi:10.1002/14651858.CD011612.pub2
- McGowan, J.C., Lagamma, C.T., Lim, S.C., Tsitsiklis, M., Neria, Y., Brachman, R.A., Denny, C.A., 2017. Prophylactic Ketamine Attenuates Learned Fear. *Neuropsychopharmacology* 42, 1577–1589. doi:10.1038/npp.2017.19
- Melo, A., Kokras, N., Dalla, C., Ferreira, C., Ventura-Silva, A.P., Sousa, N., Pêgo, J.M., 2015. The positive effect on ketamine as a priming adjuvant in antidepressant treatment. *Transl. Psychiatry* 5, 1–10. doi:10.1038/tp.2015.66
- Merali, Z., Levac, C., Anisman, H., 2003. Validation of a simple, ethologically relevant paradigm for assessing anxiety in mice. *Biol. Psychiatry* 54, 552–565. doi:10.1016/S0006-3223(02)01827-9
- Millan, M.J., Goodwin, G.M., Meyer-Lindenberg, A., Ove Ogren, S., 2015. Learning from the past and looking to the future: Emerging perspectives for improving the treatment of psychiatric disorders. *Eur. Neuropsychopharmacol.* 25, 599–656. doi:10.1016/j.euroneuro.2015.01.016
- Mlinarić, A., Horvat, M., Smolčić, V.Š., 2017. Dealing with the positive publication bias: Why you should really publish your negative results. *Biochem. Medica* 27, 1–6. doi:10.11613/BM.2017.030201
- Moghaddam, B., Adams, B., Verma, A., Daly, D., 1997. Activation of glutamatergic neurotransmission by ketamine: a novel step in the pathway from NMDA receptor blockade to dopaminergic and cognitive disruptions associated with the prefrontal

- cortex. *J. Neurosci.* 17, 2921–2927. doi:<https://doi.org/10.1523/JNEUROSCI.17-08-02921.1997>
- Mohammad, F., Ho, J., Woo, J.H., Lim, C.L., Poon, D.J.J., Lamba, B., Claridge-Chang, A., 2016. Concordance and incongruence in preclinical anxiety models: Systematic review and meta-analyses. *Neurosci. Biobehav. Rev.* 68, 504–529. doi:[10.1016/j.neubiorev.2016.04.011](https://doi.org/10.1016/j.neubiorev.2016.04.011)
- Mohammad Shadli, S., Kawe, T., Martin, D., McNaughton, N., Neehoff, S., Glue, P., 2018. Ketamine effects on EEG during therapy of treatment-resistant generalized anxiety and social anxiety. *Int. J. Neuropsychopharmacol.* 21, 717–724. doi:[10.1093/ijnp/pyy032](https://doi.org/10.1093/ijnp/pyy032)
- Moreira, F.A., Gobira, P.H., Viana, T.G., Vicente, M.A., Zangrossi, H., Graeff, F.G., 2013. Modeling panic disorder in rodents. *Cell Tissue Res.* 354, 119–125. doi:[10.1007/s00441-013-1610-1](https://doi.org/10.1007/s00441-013-1610-1)
- Morena, M., Berardi, A., Peloso, A., Valeri, D., Palmery, M., Trezza, V., Schelling, G., Campolongo, P., 2017. Effects of ketamine, dexmedetomidine and propofol anesthesia on emotional memory consolidation in rats: Consequences for the development of post-traumatic stress disorder. *Behav. Brain Res.* 329, 215–220. doi:[10.1016/j.bbr.2017.04.048](https://doi.org/10.1016/j.bbr.2017.04.048)
- Muller, J., Pentylala, Sahana, Dilger, J., Pentylala, Srinivas, 2016. Ketamine enantiomers in the rapid and sustained antidepressant effects. *Ther. Adv. Psychopharmacol.* 6, 185–192. doi:[10.1177/2045125316631267](https://doi.org/10.1177/2045125316631267)
- Murrough, J.W., Perez, A.M., Pillemer, S., Stern, J., Michael, K., Collins, K.A., Mathew, S.J., Dennis, S., 2013. Rapid and Longer-Term Antidepressant Effects of Repeated Ketamine Infusions in Treatment- Resistant Major Depression. *Biol. Psychiatry* 74, 250–256. doi:[10.1016/j.biopsych.2012.06.022](https://doi.org/10.1016/j.biopsych.2012.06.022).Rapid
- Murrough, J.W., Yaquibi, S., Sayed, S., Charney, D.S., 2015. Emerging drugs for the treatment of anxiety. *Expert Opin. Emerg. Drugs* 20, 1–14. doi:[10.1517/14728214.2011.521497](https://doi.org/10.1517/14728214.2011.521497)
- Musazzi, L., Tornese, P., Sala, N., Popoli, M., 2018. What acute stress protocols can tell us about PTSD and stress-related neuropsychiatric disorders. *Front. Pharmacol.* 9, 1–13. doi:[10.3389/fphar.2018.00758](https://doi.org/10.3389/fphar.2018.00758)
- Nash, J.R., Nutt, D.J., 2005. Pharmacotherapy of anxiety. *Handb. Exp. Pharmacol.* 169, 469–501. doi:[10.1007/3-540-28082-0-17](https://doi.org/10.1007/3-540-28082-0-17)
- Nestler, E.J., Hyman, S.E., 2010. Animal models of neuropsychiatric disorders. *Nat. Neurosci.* 13, 1161–1169. doi:[10.1038/nn.2647](https://doi.org/10.1038/nn.2647)

- Newport, D.J., Carpenter, L.L., McDonald, W.M., Potash, J.B., Tohen, M., Nemeroff, C.B., 2015. Ketamine and other NMDA antagonists: Early clinical trials and possible mechanisms in depression. *Am. J. Psychiatry* 172, 950–966. doi:10.1176/appi.ajp.2015.15040465
- Papp, M., Gruca, P., Lason-Tyburkiewicz, M., Willner, P., 2017. Antidepressant, anxiolytic and procognitive effects of subacute and chronic ketamine in the chronic mild stress model of depression. *Behav. Pharmacol.* 28, 1–8. doi:10.1097/FBP.0000000000000259
- Percie, N., Hurst, V., Ahluwalia, A., Alam, S., Avey, M.T., Baker, M., 2019. The ARRIVE guidelines 2019: updated guidelines for reporting animal research. *bioRxiv*. doi:10.1101/703181
- Pham, T.H., Mendez-David, I., Defaix, C., Guiard, B.P., Tritschler, L., David, D.J., Gardier, A.M., 2017. Ketamine treatment involves medial prefrontal cortex serotonin to induce a rapid antidepressant-like activity in BALB/cJ mice. *Neuropharmacology* 112, 198–209. doi:10.1016/j.neuropharm.2016.05.010
- Phan, K.L., Fitzgerald, C.A.D.A., Cortese, B.M., Seraji-bozorgzad, N., Tancer, M.E., Moore, G.J., 2005. Anterior cingulate neurochemistry in social anxiety disorder: 1 H-MRS at 4 Tesla 16, 16–19.
- Pietersen, C.Y., Bosker, F.J., Postema, F., Fokkema, D.S., Korf, J., den Boer, J.A., 2006. Ketamine administration disturbs behavioural and distributed neural correlates of fear conditioning in the rat. *Prog. Neuro-Psychopharmacology Biol. Psychiatry* 30, 1209–1218. doi:10.1016/j.pnpbp.2006.02.019
- Polis, A.J., Fitzgerald, P.J., Hale, P.J., Watson, B.O., 2019. Rodent ketamine depression-related research: finding patterns in a literature of variability. *Behav. Brain Res.*
- Popik, P., Hołuj, M., Kos, T., Nowak, G., Librowski, T., Sałat, K., 2017. Comparison of the psychopharmacological effects of tiletamine and ketamine in rodents. *Neurotox. Res.* 32, 544–554. doi:10.1007/s12640-017-9759-0
- Powell, T.R., Fernandes, C., Schalkwyk, L.C., 2012. Depression-Related Behavioral Tests. *Curr. Protoc. Mouse Biol.* 2, 119–127. doi:10.1002/9780470942390.mo110176
- Prut, L., Belzung, C., Rabelias, U.F., Psychobiologie, E., 2003. The open field as a paradigm to measure the effects of drugs on anxiety-like behaviors: a review. *Eur. J. Pharmacol.* 463, 3–33. doi:10.1016/S0014-2999(03)01272-X
- Ramaker, M.J., Dulawa, S.C., 2017. Identifying fast-onset antidepressants using rodent models. *Mol. Psychiatry* 22, 656–665. doi:10.1038/mp.2017.36
- Ray, S.M., Kious, B.M., 2016. Sustained resolution of panic disorder, agoraphobia, and



- generalized anxiety disorder with a single ketamine infusion: A case report. *Prim. care companion CNS Disord.* 18, 2–4.
- Refsgaard, L.K., Pickering, D.S., Andreasen, J.T., 2017. Investigation of antidepressant-like and anxiolytic-like actions and cognitive and motor side effects of four N-methyl-D-aspartate receptor antagonists in mice. *Behav. Pharmacol.* 28, 37–47. doi:10.1097/FBP.0000000000000266
- Remes, O., Brayne, C., van der Linde, R., Lafortune, L., 2016. A systematic review of reviews on the prevalence of anxiety disorders in adult populations. *Brain Behav.* 6. doi:10.1002/brb3.497
- Riaza Bermudo-Soriano, C., Perez-Rodriguez, M.M., Vaquero-Lorenzo, C., Baca-Garcia, E., Bermudo-Soriano, C.R., Perez-Rodriguez, M.M., Vaquero-Lorenzo, C., Baca-Garcia, E., 2012. New perspectives in glutamate and anxiety. *Pharmacol. Biochem. Behav.* 100, 752–74. doi:10.1016/j.pbb.2011.04.010
- Riehl, R., Kyzar, E., Allain, A., Green, J., Hook, M., Monnig, L., Rhymes, K., Roth, A., Pham, M., Razavi, R., DiLeo, J., Gaikwad, S., Hart, P., Kalueff, A. V., 2011. Behavioral and physiological effects of acute ketamine exposure in adult zebrafish. *Neurotoxicol. Teratol.* 33, 658–667. doi:10.1016/j.ntt.2011.05.011
- Roenker, N.L., Gudelsky, G.A., Ahlbrand, R., Horn, P.S., Richtand, N.M., 2012. Evidence for involvement of nitric oxide and GABAB receptors in MK-801- Stimulated release of glutamate in rat prefrontal cortex. *Neuropharmacology* 63, 575–581. doi:10.1016/j.neuropharm.2012.04.032
- Saland, S.K., Kabbaj, M., 2018. Sex differences in the pharmacokinetics of low-dose ketamine in plasma and brain of male and female rats., *Journal of Pharmacology and Experimental Therapeutics.* doi:10.1124/jpet.118.251652
- Salat, K., Siwek, A., Starowicz, G., Librowski, T., Nowak, G., Drabik, U., Gajdosz, R., Popik, P., 2015. Antidepressant-like effects of ketamine , norketamine and dehydronorketamine in forced swim test: Role of activity at NMDA receptor. *Neuropharma* 99, 301–307. doi:10.1016/j.neuropharm.2015.07.037
- Salvadore, G., Cornwell, B.R., Colon-Rosario, V., Coppola, R., Grillon, C., Zarate, C.A., Manji, H.K., 2009. Increased Anterior Cingulate Cortical Activity in Response to Fearful Faces: A Neurophysiological Biomarker that Predicts Rapid Antidepressant Response to Ketamine. *Biol. Psychiatry* 65, 289–295. doi:10.1016/j.biopsych.2008.08.014
- Saur, L., Neves, L.T., Greggio, S., Venturin, G.T., Jeckel, C.M.M., Costa Da Costa, J.,

- Bertoldi, K., Schallenger, B., Siqueira, I.R., Mestriner, R.G., Xavier, L.L., 2017. Ketamine promotes increased freezing behavior in rats with experimental PTSD without changing brain glucose metabolism or BDNF. *Neurosci. Lett.* 658, 6–11. doi:10.1016/j.neulet.2017.08.026
- Schenberg, L.C., Bittencourt, A.S., Sudré, E.C.M., Vargas, L.C., 2001. Modeling panic attacks. *Neurosci. Biobehav. Rev.* 25, 647–659. doi:10.1016/S0149-7634(01)00060-4
- Schönenberg, M., Reichwald, U., Domes, G., Badke, A., Hautzinger, M., 2005. Effects of peritraumatic ketamine medication on early and sustained posttraumatic stress symptoms in moderately injured accident victims. *Psychopharmacology (Berl)*. 182, 420–425. doi:10.1007/s00213-005-0094-4
- Schönenberg, M., Reichwald, U., Domes, G., Badke, A., Hautzinger, M., 2008. Ketamine aggravates symptoms of acute stress disorder in a naturalistic sample of accident victims. *J. Psychopharmacol.* 22, 493–497. doi:10.1177/0269881107082481
- Shephard, R.A., Broadhurst, P.L., 1982. Hyponeophagia and arousal in rats: Effects of diazepam, 5-methoxy-N,N-dimethyltryptamine, d-amphetamine and food deprivation. *Psychopharmacology (Berl)*. 78, 368–372. doi:10.1007/BF00433744
- Silvestre, J.S.S., Nadal, R., Pallarés, M., Ferré, N., Silvestre, J.S.; Nadal, R.; Pallares, M.; Ferré, N., Silvestre, J.S.S., Nadal, R., Pallarés, M., Ferré, N., 1997. Acute effects of ketamine in the holeboard, the elevated-plus maze, and the social interaction test in wistar rats. *Depress. Anxiety* 5, 29–33. doi:10.1002/(SICI)1520-6394(1997)5:1<29::AID-DA5>3.0.CO;2-0
- Smith, A.J., Clutton, R.E., Lilley, E., Hansen, K.E.A., Brattelid, T., 2018. PREPARE: guidelines for planning animal research and testing. *Lab. Anim.* 52, 135–141. doi:10.1177/0023677217724823
- Sobota, R., Mihara, T., Forrest, A., Featherstone, R.E., Siegel, S.J., 2015. Oxytocin reduces amygdala activity, increases social interactions and reduces anxiety-like behavior irrespective of NMDAR antagonism. *Behav. Neurosci.* 129, 389–398. doi:10.1037/bne0000074.Oxytocin
- Soumier, A., Carter, R.M., Schoenfeld, T.J., Cameron, H.A., 2016. New hippocampal neurons mature rapidly in response to ketamine but are not required for its acute antidepressant effects on neophagia in Rats. *eNeuro* 3. doi:10.1523/ENEURO.0116-15.2016
- Stein, D.J., Scott, K.M., Jonge, P. de, Kessler, R.C., 2017. Epidemiology of anxiety disorders: From surveys to nosology and back. *Dialogues Clin. Neurosci.* 19, 127–136.

- Strawn, J.R., Chu, W.-J., Whitsel, R.M., Weber, W.A., Norris, M.M., Adler, C.M., Eliassen, J.C., Phan, K.L., Strakowski, S.M., DelBello, M.P., 2013. A Pilot Study of Anterior Cingulate Cortex Neurochemistry in Adolescents with Generalized Anxiety Disorder. *Neuropsychobiology* 67, 224–229. doi:10.1159/000347090
- Taylor, J.H., Landeros-Weisenberger, A., Coughlin, C., Mulqueen, J., Johnson, J.A., Gabriel, D., Reed, M.O., Jakubovski, E., Bloch, M.H., 2018. Ketamine for social anxiety disorder: A randomized, placebo-controlled crossover trial. *Neuropsychopharmacology* 43, 325–333. doi:10.1038/npp.2017.194
- Teixeira, R.C., Zangrossi, H., Graeff, F.G., 2000. Behavioral effects of acute and chronic imipramine in the elevated T-maze model of anxiety. *Pharmacol. Biochem. Behav.* 65, 571–6.
- Thelen, C., Flaherty, E., Saurine, J., Sens, J., Mohamed, S., Pitychoutis, P.M., 2019. Sex differences in the temporal neuromolecular and synaptogenic effects of the rapid-acting antidepressant drug ketamine in the mouse brain. *Neuroscience* 398, 182–192. doi:10.1016/j.neuroscience.2018.11.053
- Thelen, C., Sens, J., Mauch, J., Pandit, R., Pitychoutis, P.M., 2016. Repeated ketamine treatment induces sex-specific behavioral and neurochemical effects in mice. *Behav. Brain Res.* 312, 305–312. doi:10.1016/j.bbr.2016.06.041
- Tillmann, S., 2017. Mind the gap - towards complete and transparent reporting of animal research. *Med. Writ.* 26, 24–27.
- Trevlopoulou, A., Touzlatzi, N., Pitsikas, N., 2016. The nitric oxide donor sodium nitroprusside attenuates recognition memory deficits and social withdrawal produced by the NMDA receptor antagonist ketamine and induces anxiolytic-like behaviour in rats. *Psychopharmacology (Berl)*. 233, 1045–1054. doi:10.1007/s00213-015-4181-x
- Turner, E.H., Matthews, A.M., Linardatos, E., Tell, R.A., Rosenthal, R., 2008. Selective publication of antidepressant trials and its influence on apparent efficacy. *N. Engl. J. Med.* 358, 252–260. doi:10.1016/s0093-3619(08)79042-7
- Vogt, M.A., Vogel, A.S., Pfeiffer, N., Gass, P., Inta, D., 2015. Role of the nitric oxide donor sodium nitroprusside in the antidepressant effect of ketamine in mice. *Eur. Neuropsychopharmacol.* 25, 1848–1852. doi:10.1016/j.euroneuro.2015.06.012
- Võikar, V., Kõks, S., Vasar, E., Rauvala, H., 2001. Strain and gender differences in the behavior of mouse lines commonly used in transgenic studies. *Physiol. Behav.* 72, 271–281.
- Walker, A.J., Foley, B.M., Sutor, S.L., McGillivray, J.A., Frye, M.A., Tye, S.J., 2015.

- Peripheral proinflammatory markers associated with ketamine response in a preclinical model of antidepressant-resistance. *Behav. Brain Res.* 293, 198–202. doi:10.1016/j.bbr.2015.07.026
- Wang, N., Zhang, G.F., Liu, X.Y., Sun, H.L., Wang, X.M., Qiu, L.L., Yang, C., Yang, J.J., 2014. Downregulation of Neuregulin 1-ErbB4 Signaling in Parvalbumin Interneurons in the Rat Brain May Contribute to the Antidepressant Properties of Ketamine. *J. Mol. Neurosci.* 54, 211–218. doi:10.1007/s12031-014-0277-8
- White, P.F., Ham, J., Way, W.L., Trevor, A.J., 1980. Pharmacology of ketamine isomers in surgical patients. *Anesthesiology* 52, 231–239.
- Wong, E.H.F., Kemp, J.A., Priestley, T., Knight, A.R., Woodruff, G.N., Iversen, L.L., 1986. The anticonvulsant MK-801 is a potent N-methyl-D-aspartate antagonist. *Proc. Natl. Acad. Sci. U. S. A.* 83, 7104–7108. doi:10.1073/pnas.83.18.7104
- World Health Organization, 2016. Safer access to pesticides for suicide prevention Experiences from community interventions, World Health Organization.
- Yang, C., Ren, Q., Qu, Y., Zhang, J.C., Ma, M., Dong, C., Hashimoto, K., 2018. Mechanistic target of rapamycin-independent antidepressant effects of (R)-ketamine in a social defeat stress model. *Biol. Psychiatry* 83, 18–28. doi:10.1016/j.biopsych.2017.05.016
- Yang, C., Shirayama, Y., Zhang, J., Ren, Q., Yao, W., Ma, M., Dong, C., Hashimoto, K., 2015. R-ketamine: a rapid-onset and sustained antidepressant without psychotomimetic side effects. *Transl. Psychiatry* 5, e632. doi:10.1038/tp.2015.136
- Zangrossi, H., Graeff, F.G., 1997. Behavioral validation of the elevated T-maze, a new animal model of anxiety. *Brain Res. Bull.* 44, 1–5. doi:10.1016/S0361-9230(96)00381-4
- Zangrossi Jr, H., Graeff, F.G., 2014. Serotonin in anxiety and panic: Contributions of the elevated T-maze. *Neurosci. Biobehav. Rev.* 46, 397–406. doi:10.1016/j.neubiorev.2014.03.007
- Zanos, P., Gould, T., 2018. Mechanisms of ketamine action as an antidepressant. *Mol. Psychiatry* 23, 801–811. doi:10.1038/mp.2017.255
- Zanos, P., Piantadosi, S.C., Wu, H.-Q., Pribut, H.J., Dell, M.J., Can, A., Snodgrass, H.R., Zarate, C.A., Schwarcz, R., Gould, T.D., 2015. The Prodrug 4-Chlorokynurenine Causes Ketamine-Like Antidepressant Effects, but Not Side Effects, by NMDA/GlycineB-Site Inhibition. *J. Pharmacol. Exp. Ther.* 355, 76–85. doi:10.1124/jpet.115.225664
- Zarate Jr, C.A., Singh, J.B., Carlson, P.J., Brutsche, N.E., Ameli, R., Luckenbaugh, D.A., Charney, D.S., Manji, H.K., 2006. A randomized trial of an N-methyl-D-aspartate antagonist in treatment-resistant major depression. *Arch. Gen. Psychiatry* 63, 856–864.

doi:10.1001/archpsyc.63.8.856

- Zeng, M.C., Niciu, M.J., Luckenbaugh, D.A., Ionescu, D.F., Richards, E.M., Franco-Chaves, J., Brutsche, N.E., Zarate, C.A., 2013. Reply to: Acute stress symptoms do not worsen in posttraumatic stress disorder and abuse with a single subanesthetic dose of ketamine. *Biol. Psychiatry* 73, e37–e38. doi:10.1016/j.biopsych.2012.10.018
- Zhang, J., Li, S., Hashimoto, K., 2014. R(–)-ketamine shows greater potency and longer lasting antidepressant effects than S (+)-ketamine. *Pharmacol. Biochem. Behav.* 116, 137–141. doi:10.1016/j.pbb.2013.11.033
- Zhang, L.-M., Yao, J.-Z., Li, Y., Li, K., Chen, H.-X., Zhang, Y.-Z., Li, Y.-F., 2015. Anxiolytic effects of ketamine in animal models of posttraumatic stress disorder. *Psychopharmacology (Berl)*. 232, 663–672. doi:10.1155/2012/623753
- Zuo, D.Y., Zhang, Y.H., Cao, Y., Wu, C.F., Tanaka, M., Wu, Y.L., 2006. Effect of acute and chronic MK-801 administration on extracellular glutamate and ascorbic acid release in the prefrontal cortex of freely moving mice on line with open-field behavior. *Life Sci.* 78, 2172–2178. doi:10.1016/j.lfs.2005.09.022
